# Supplementary material for: Bisabolane-type sesquiterpenoids fromCurcuma longaL. exert anti-influenza and anti-inflammatory activities through NF-κB/MAPK and RIG-1/STAT1/2 signaling pathways
Source: Royal Society of Chemistry journal article supplement (doi:10.1039/d1fo01212f), 2021-01-01
Supplement: d1fo01212f1.pdf [file d1fo01212f1.pdf]

## SUPPLEMENTARY MATERIAL

Anti-influenza and anti-inflammatory activity of bisabolane-type sesquiterpenoids from *Curcuma longa* L. and their mechanisms of action

Huihui Ti <sup>a, 1, \*</sup>, Zhitong Mai <sup>b, 1</sup>, Zhoulang Wang <sup>b, 1</sup>, Wenjie Zhang <sup>b</sup>, Mengjie Xiao <sup>c</sup>,  
Zifeng Yang <sup>b, \*</sup>, Pangchui Shaw <sup>c, \*</sup>

<sup>a</sup> *School of Clinical Pharmacy, Guangdong Pharmaceutical University, Guangzhou, 510006, P. R. China*

<sup>b</sup> *State Key Laboratory of Respiratory Disease, National Clinical Research Center for Respiratory Disease, Guangzhou Institute of Respiratory Health, The First Affiliated Hospital, Guangzhou Medical University, Guangzhou 510120, P. R. China*

<sup>c</sup> *School of Life Sciences, The Chinese University of Hong Kong, Shatin, N. T, Hong Kong, SAR 999077, P. R. China*

---

\*Corresponding authors

Huihui Ti, Ph.D. E-mail: [tihuihui@126.com](mailto:tihuihui@126.com); Zifeng Yang, Ph.D. E-mail: [jeffyah@163.com](mailto:jeffyah@163.com); Pangchui Shaw, Ph.D. E-mail: [pcshaw@cuhk.edu.hk](mailto:pcshaw@cuhk.edu.hk)

## Abstract

Influenza is a viral respiratory illness that causes seasonal epidemics and occasional pandemics. Disease severity may be contributed by influenza virus-induced cytokine dysregulation. The study was designed to investigate the isolation and identification bisabolane-type sesquiterpenoids from *Curcuma longa* L. and their antiviral and anti-inflammatory activities against H1N1 and their potential effect in regulating host immune response *in vitro*. A pair of new bisabolane-type sesquiterpenoids, (6S,7S)-3-hydroxy-3-hydroxymethylbisabola-1,10-diene-9-one (**18**) together with seventeen known analogs (**1–17**) were isolated and elucidated from *Curcuma longa* L. Compounds **2**, **11** and **14** could significantly inhibit A/PR/8/34 (H1N1) replication in MDCK cells, and compound **2** could significantly inhibit A/PR/8/34 (H1N1) replication in A549 cells. Compounds **4**, **8**, **9**, **13** and **17** could markedly reduce pro-inflammatory cytokines (TNF- $\alpha$ , IL-6, IL-8 and IP-10) production at the mRNA and protein levels in A549 cells. Compound **4** regulated the levels of steroid biosynthesis, oxidative phosphorylation and protein processing in the endoplasmic reticulum, thereby inhibiting immune responses by a proteomics analysis. Furthermore, compound **4** could inhibit the expression of p-NF- $\kappa$ B p65, NF- $\kappa$ B p65, I $\kappa$ B $\alpha$ , p-p38 MAPK, p-I $\kappa$ B $\alpha$ , RIG-1, STAT-1/2 and p-STAT-1/2 in the signaling pathways. These findings indicate that bisabolane-type sesquiterpenoids of *C. longa* could inhibit the expression of inflammatory cytokines induced by virus and regulating the activity of NF- $\kappa$ B/MAPK and RIG-1/STAT-1/2 signaling pathways *in vitro*.

Key words: *Curcuma longa* L.; bisabolane-type sesquiterpenoids; anti-inflammatory

activities; anti-influenza; proteomics analysis; NF- $\kappa$ B/MAPK; RIG-1/STAT-1/2

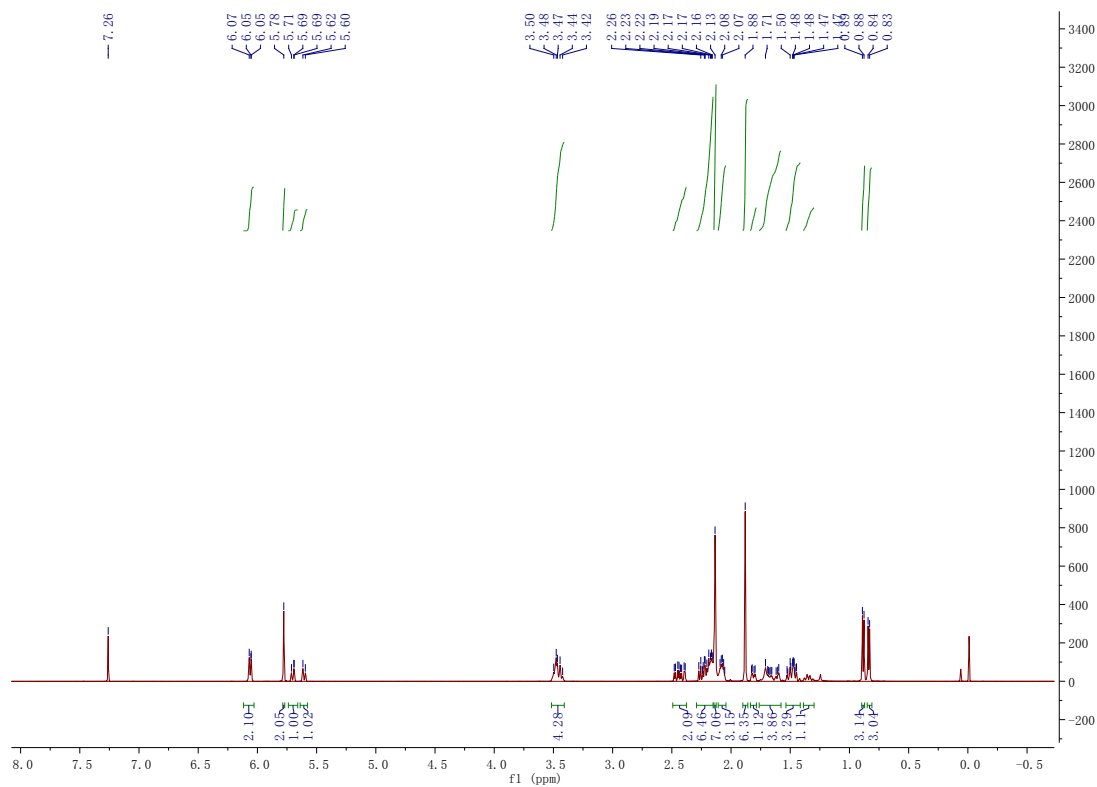

Figure S1  $^1\text{H}$ NMR spectrum of compound 18

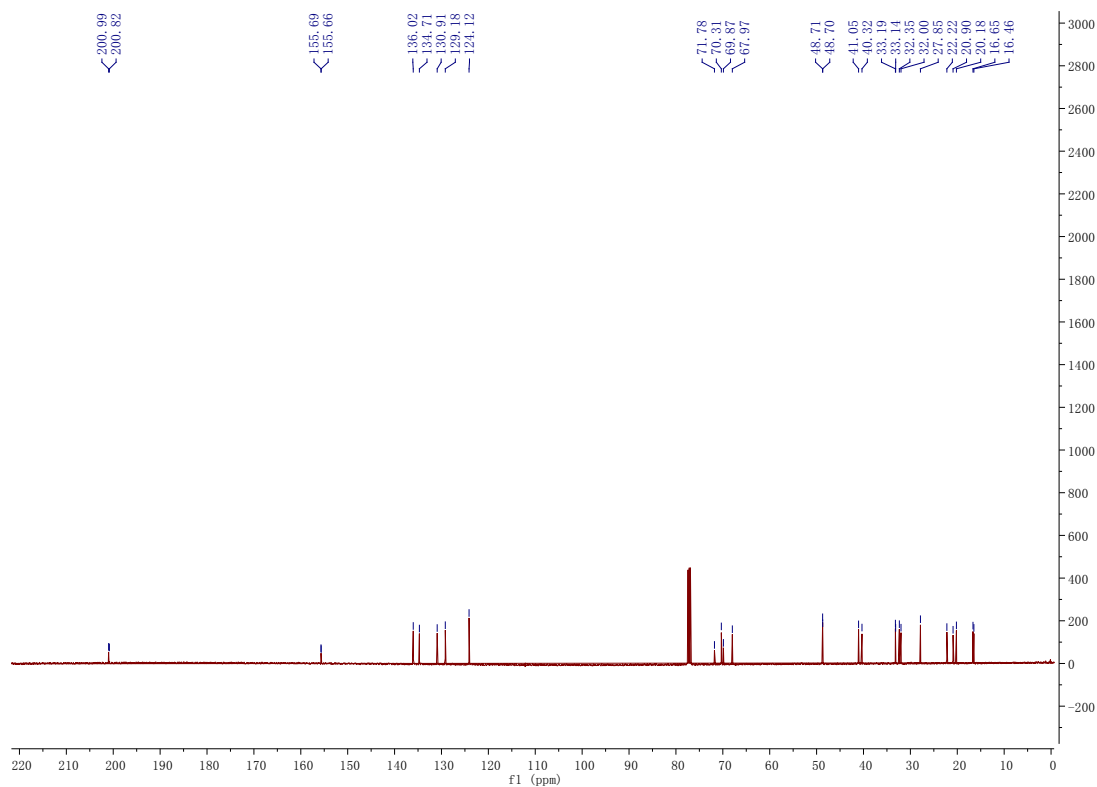

Figure S2  $^{13}\text{C}$ NMR spectrum of compound 18

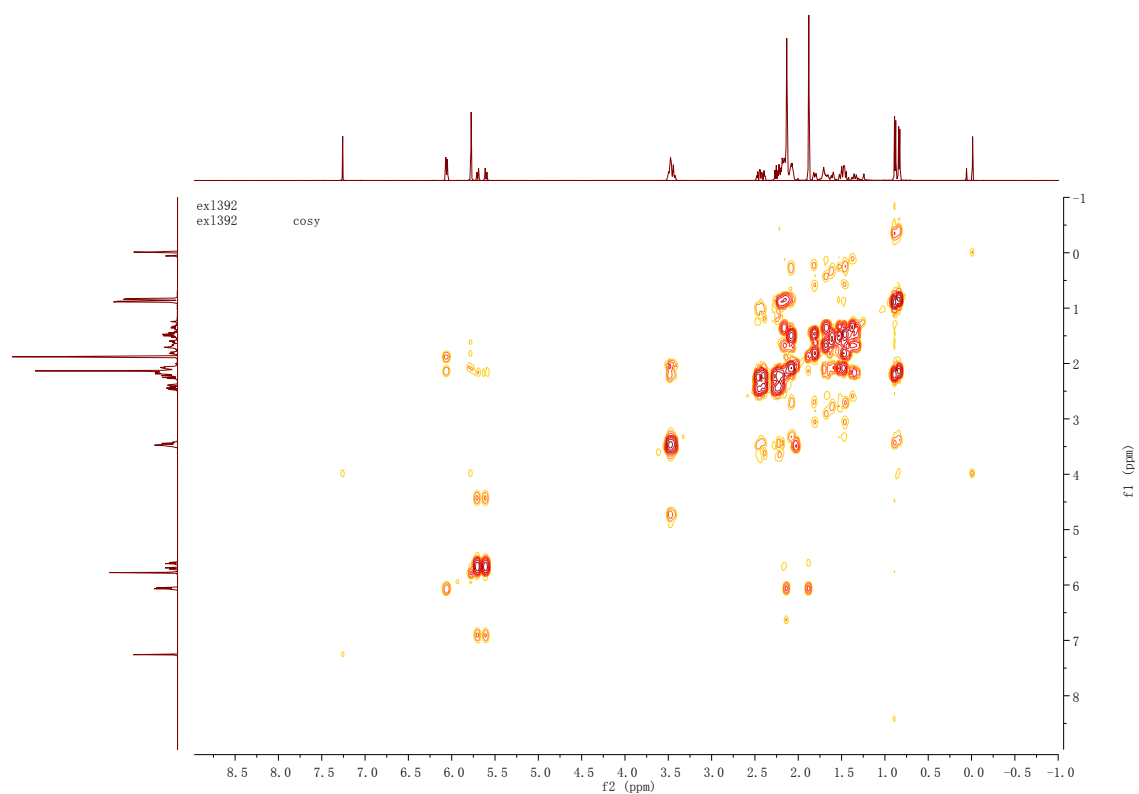

**Figure S3** H-HCOSY spectrum of compound **18**

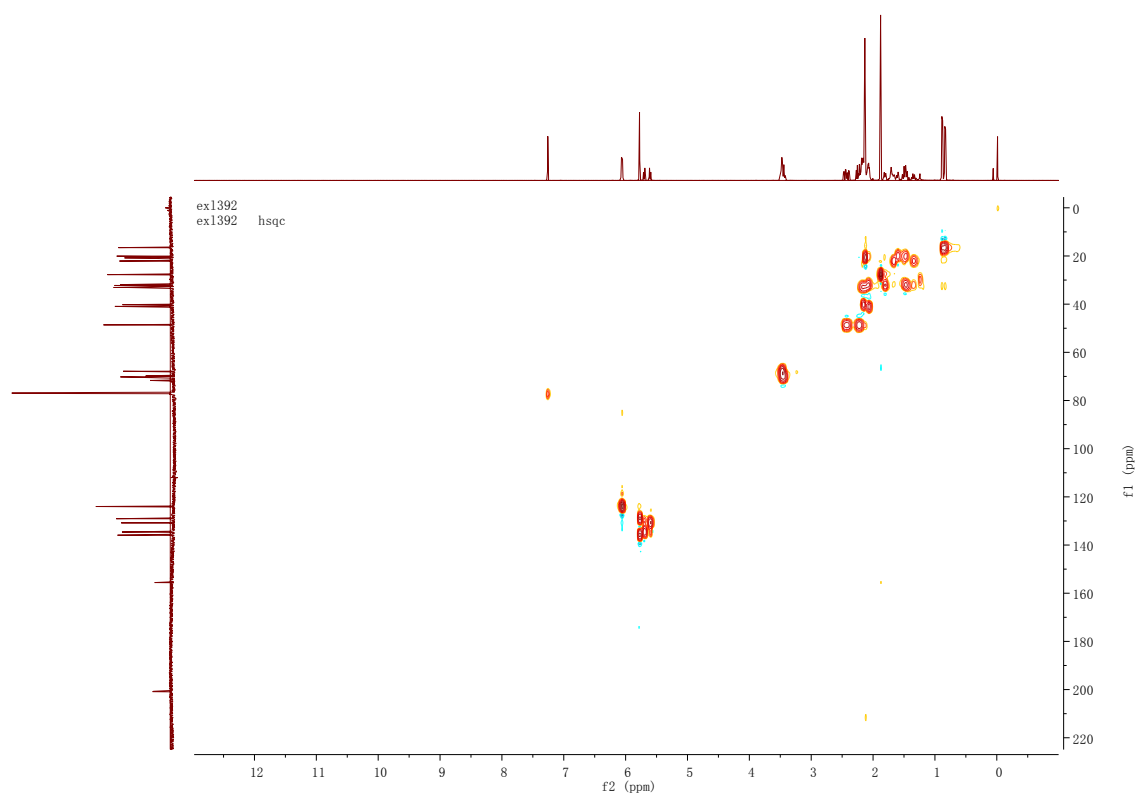

**Figure S4** HSQC spectrum of compound **18**

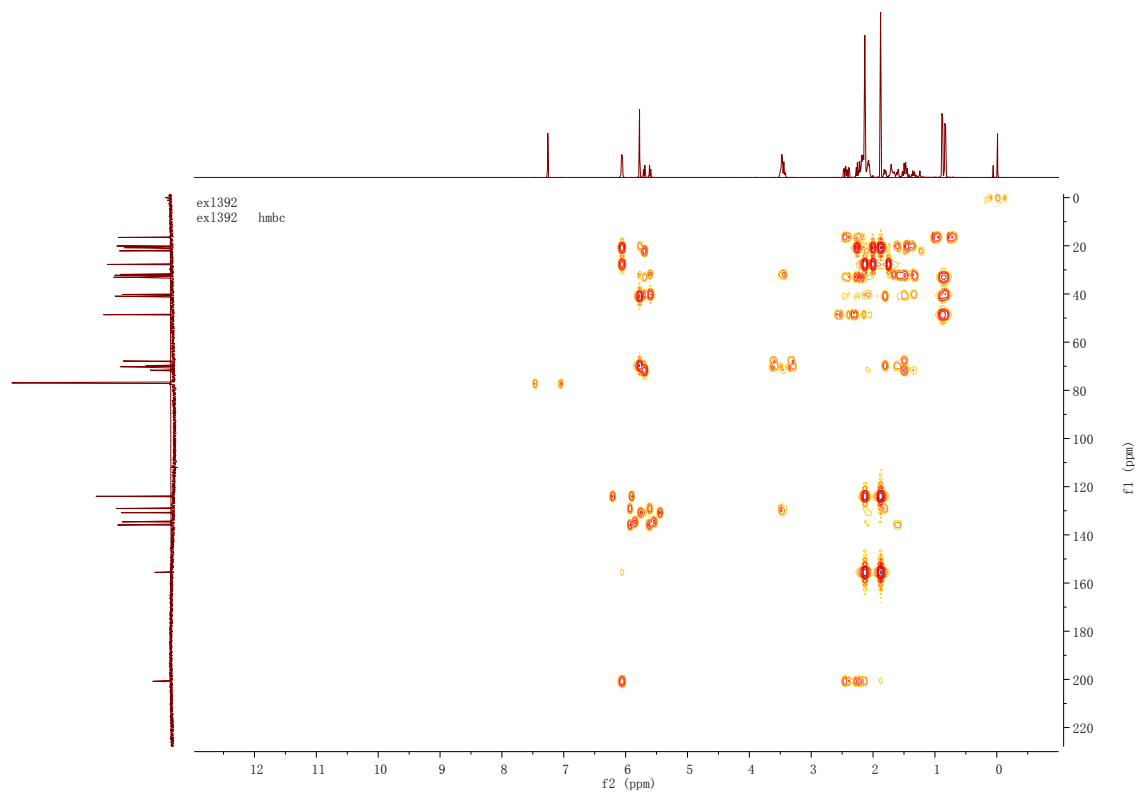

**Figure S5** HMBC spectrum of compound **18**

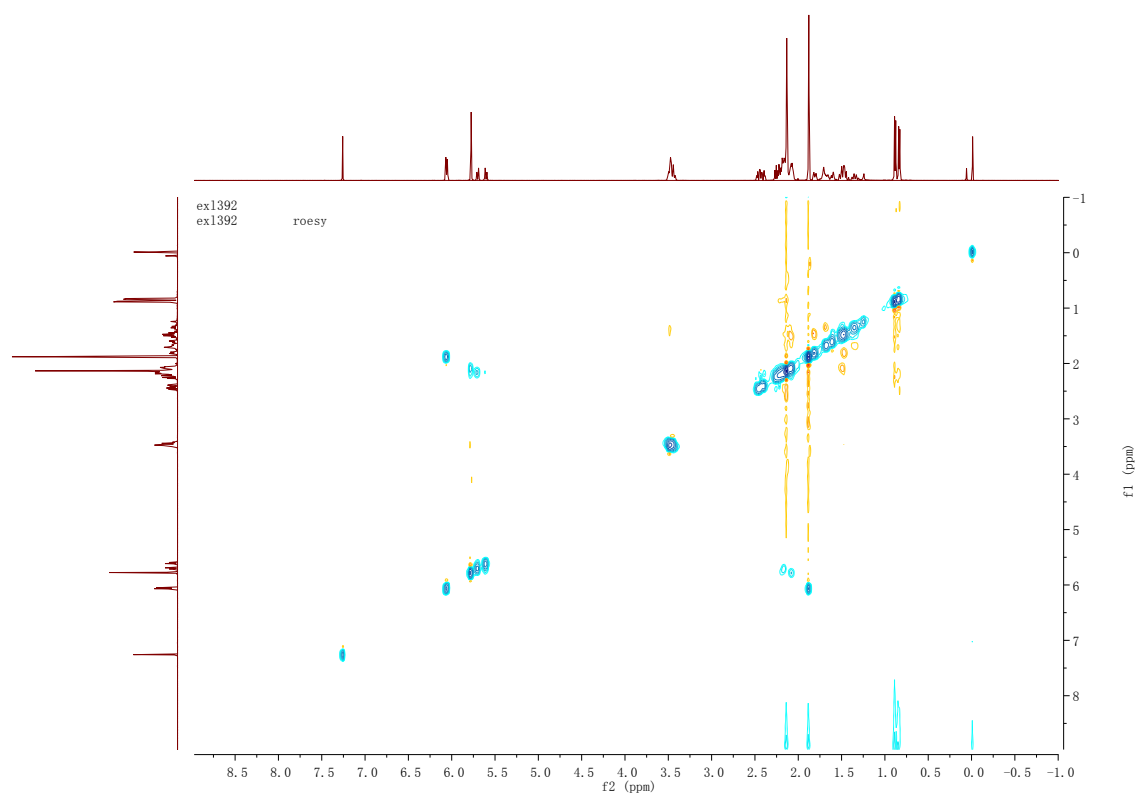

**Figure S6** ROESY spectrum of compound **18**

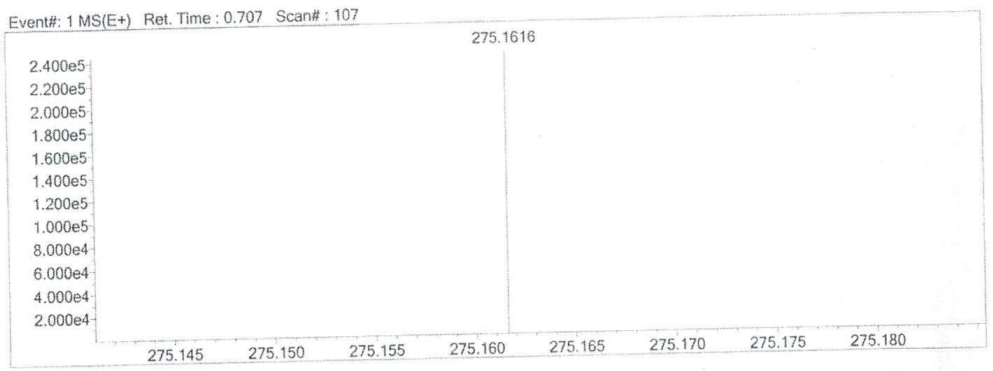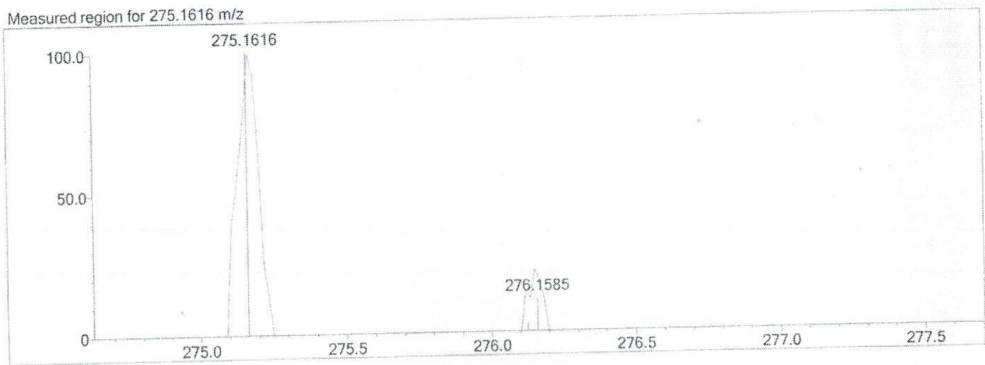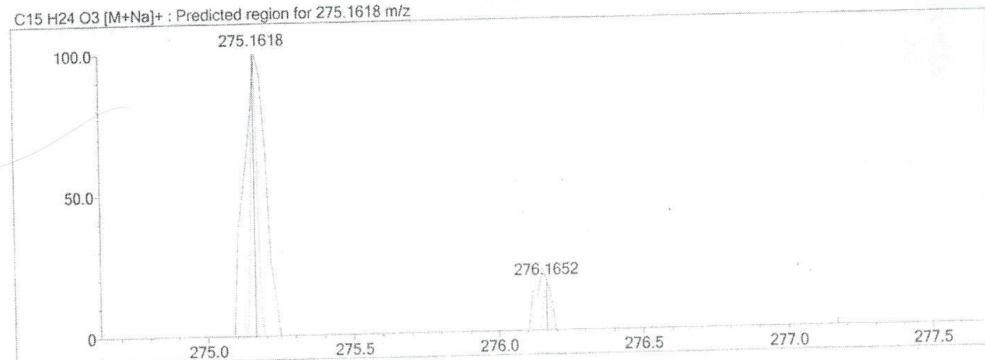

| Formula (M) | Ion     | Meas. m/z | Pred. m/z | Df. (mDa) | Df. (ppm) | DBE |
|-------------|---------|-----------|-----------|-----------|-----------|-----|
| C15 H24 O3  | [M+Na]+ | 275.1616  | 275.1618  | -0.2      | -0.73     | 4.0 |

**Figure S7** HRESIMS spectrum of compound **18**

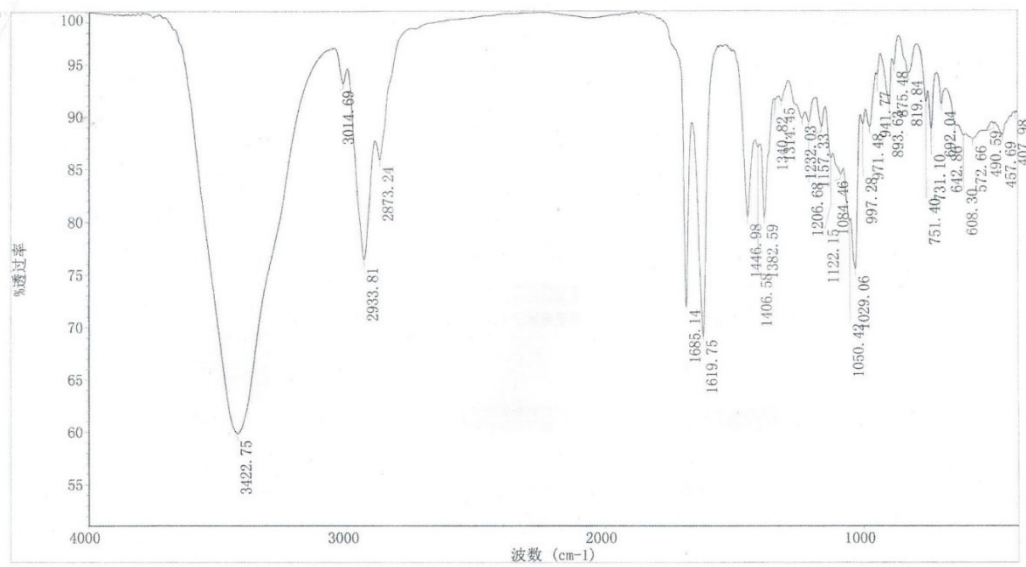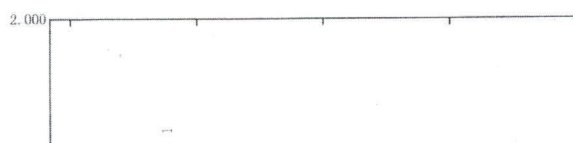

**Figure S8** UV spectrum of compound **18**

**Figure S9** IR spectrum of compound **18**



| Position | $\delta_{\text{H}}$ , mult. $J$ in Hz     | $\delta_{\text{C}}$ , mult. |
|----------|-------------------------------------------|-----------------------------|
| 1        | 5.70/5.78, d, $J=10.0$                    | 134.5/135.9                 |
| 2        | 5.70/5.78, d, $J=10.0$                    | 130.8/129.0                 |
| 3        |                                           | 71.6/69.7                   |
| 4        | 2.08, 1.49/1.81, 1.47, m                  | 31.8/32.2                   |
| 5        | 1.35/1.48, m                              | 67.1/60.1                   |
| 6        | 2.17/2.07, d, $J=10.0$ , 5.1              | 40.2/40.9                   |
| 7        | 2.12/2.17, m                              | 33                          |
| 8        | 2.41, 2.21/2.46, 2.25, dd, $J=15.3$ , 7.2 | 48.5/48.6                   |
| 9        |                                           | 200.8/200.7                 |
| 10       | 6.05/6.07, br s                           | 124                         |
| 11       |                                           | 155.6/155.5                 |
| 12       | 1.88, br s                                | 27.7                        |
| 13       | 2.13, br s                                | 20.7                        |
| 14       | 0.84/0.88, d, $J=6.5$                     | 16.3/16.5                   |
| 15       | 3.47/3.49, 3.43                           | 67.8/70.2                   |

Table S1  $^1\text{H}$ NMR (500 MHz) and  $^{13}\text{C}$ NMR data (125 MHz) for Compounds **18** in  $\text{CDCl}_3$ .

| Number           | Compound Name                                     | TC50 ( $\mu\text{g/ml}$ ) | IC50 ( $\mu\text{g/ml}$ ) |
|------------------|---------------------------------------------------|---------------------------|---------------------------|
| Compound 2       | Bisabola-3,10-dien-2-one                          | 158.50 $\pm$ 19.50        | 16.79 $\pm$ 4.03          |
| Compound 11      | 4-(6-Methyl-4-oxohept-5-en-yl)cyclohex-2-en-1-one | 32.47 $\pm$ 7.47          | 23.10 $\pm$ 2.06          |
| Compound 14      | 1,4-Epidioxybisabola-2,10-dien-9-one              | 11.97 $\pm$ 5.72          | 11.43 $\pm$ 0.31          |
| Positive control | <b>OSE</b>                                        | >1000                     | 0.04                      |

(A)

| Number           | Compound Name            | TC50 ( $\mu\text{g/ml}$ ) | IC50 ( $\mu\text{g/ml}$ ) |
|------------------|--------------------------|---------------------------|---------------------------|
| Compound 2       | Bisabola-3,10-dien-2-one | >100                      | 47.65 $\pm$ 2.3           |
| Positive control | <b>OSE</b>               | >1000                     | 0.04                      |

(B)

**Table S2 The anti-influenza (A/PR/8/34 (H1N1)) activity of effective compounds in MDCK (A) and A549 (B) cells**

| Gene          | Primer Sequence (5'→3')                                     |
|---------------|-------------------------------------------------------------|
| IL-6          | F: CGGGAACGAAAGAGAAGCTCTA<br>R: CGCTTGTGGAGAAGGAGTTCA       |
| IL-8          | F: TTGGCAGCCTTCCTGATTTC<br>R: TATGCACTGACATCTAAGTTCTTTAGCA  |
| TNF- $\alpha$ | F: GAAATTATTCCTGCAAGCCAATTT<br>R: TCACCCTTCTTTTTCAT-TGTAGCA |
| IP-10         | F: AACATCCAACCTTCCCAAACG<br>R: GACCCTAAGCCCCCAATTCTC        |

Table S3 Sequences of Primer Used for qRT-PCR

| Gene.names                                              | Unique.peptides | Symbol  | fc CV       | fc CV <sub>L<sub>H</sub></sub> | fc CV <sub>L<sub>L</sub></sub> |
|---------------------------------------------------------|-----------------|---------|-------------|--------------------------------|--------------------------------|
| <b>Upregulated proteins by Compound 1 (Number: 122)</b> |                 |         |             |                                |                                |
| TAB1                                                    | 2               | TAB1    | 0.042062489 | 58.02664532                    | 36.73034458                    |
| CCDC93                                                  | 3               | CCDC93  | 0.771552541 | 33.6974171                     | 20.6611417                     |
| AKAP9                                                   | 3               | AKAP9   | 0.051444579 | 23.68075131                    | 9.486007122                    |
| PTGES2                                                  | 6               | PTGES2  | 0.045168548 | 23.1736519                     | 7.699158364                    |
| HPGD                                                    | 7               | HPGD    | 0.042461212 | 12.02093101                    | 6.511043138                    |
| HMG2                                                    | 3               | HMG2    | 0.141407787 | 9.86313727                     | 4.450404412                    |
| CLPP                                                    | 3               | CLPP    | 0.12632066  | 6.134334075                    | 4.260557087                    |
| PTRH2                                                   | 3               | PTRH2   | 0.602920651 | 4.450269038                    | 3.999180303                    |
| MYO5A                                                   | 5               | MYO5A   | 0.614268526 | 4.009540382                    | 3.652053168                    |
| RPL26L1                                                 | 2               | RPL26L1 | 1.040213291 | 3.967774566                    | 3.63428545                     |
| SYNE1                                                   | 5               | SYNE1   | 1.027311801 | 3.868977339                    | 3.351678654                    |
| SLC35A4                                                 | 4               | SLC35A4 | 1.251708788 | 3.410383285                    | 3.108385402                    |
| MCAT                                                    | 2               | MCAT    | 0.448979895 | 3.381733339                    | 3.049545301                    |
| FLNA                                                    | 2               | Q60FE5  | 0.545258212 | 3.290964249                    | 3.018172832                    |
| DYNLRB1;DYNLRB2                                         | 4               | DYNLRB1 | 0.418580622 | 3.28711686                     | 3.016330386                    |
| OSTF1                                                   | 3               | OSTF1   | 0.821932346 | 3.10559571                     | 2.954041468                    |
| PRPF4B                                                  | 3               | PRPF4B  | 0.38513721  | 3.050703257                    | 2.868951684                    |
| AP1S2                                                   | 2               | AP1S2   | 0.211208026 | 3.009184137                    | 2.816567111                    |
| TGFBI                                                   | 2               | TGFBI   | 0.477488228 | 2.821214483                    | 2.705630802                    |
| CSRP2                                                   | 4               | CSRP2   | 0.432085361 | 2.766477095                    | 2.635825421                    |
| FADS1                                                   | 3               | FADS1   | 0.091442288 | 2.733964826                    | 2.5988444                      |
| KPNA3                                                   | 3               | KPNA3   | 0.363311247 | 2.598462753                    | 2.406194423                    |
| APP                                                     | 3               | APP     | 0.456545176 | 2.522835709                    | 2.366754363                    |

|                 |   |          |             |             |             |
|-----------------|---|----------|-------------|-------------|-------------|
| ABCC2           | 7 | ABCC2    | 0.338565581 | 2.520961834 | 2.261095129 |
| SQLE            | 5 | SQLE     | 0.187527413 | 2.490045918 | 2.25294876  |
| TRIM47          | 3 | TRIM47   | 0.34801889  | 2.483144404 | 2.187650478 |
| UBE2D1;UBE2D4   | 2 | UBE2D1   | 0.612563481 | 2.467898572 | 1.989696883 |
| LSM12           | 3 | LSM12    | 6.025531946 | 2.361391879 | 1.988212961 |
| NFYB            | 2 | NFYB     | 0.726211478 | 2.332357482 | 1.983867275 |
| EMG1            | 4 | EMG1     | 1.187179143 | 2.324933777 | 1.983366632 |
| DHRS1           | 2 | DHRS1    | 0.301661895 | 2.256865849 | 1.966022326 |
| NPM3            | 2 | NPM3     | 0.538762386 | 2.253866589 | 1.961826206 |
| PPP2CB;PPP2CA   | 2 | PPP2CB   | 0.404819615 | 2.220969094 | 1.950247357 |
| UQCRQ           | 5 | UQCRQ    | 0.617057209 | 2.214327852 | 1.916276434 |
| MRPS5           | 2 | MRPS5    | 0.460944326 | 2.177831962 | 1.892860539 |
| VKORC1L1        | 2 | VKORC1L1 | 0.333684301 | 2.167804917 | 1.877790376 |
| PREB            | 2 | PREB     | 0.748180983 | 2.142226689 | 1.784779472 |
| COQ6            | 2 | COQ6     | 0.39945443  | 2.139634065 | 1.777182442 |
| CSNK2A1;CSNK2A3 | 6 | CSNK2A1  | 0.941324072 | 2.13605707  | 1.766305917 |
| GINS4           | 3 | GINS4    | 0.57005326  | 2.132320547 | 1.758592266 |
| RPL21           | 8 | RPL21    | 1.020769189 | 2.117198293 | 1.695277892 |
| PPP1R9B         | 2 | PPP1R9B  | 0.453647586 | 2.114423437 | 1.676814288 |
| PFDN1           | 6 | PFDN1    | 0.594564536 | 2.109178974 | 1.65532667  |
| HDGFRP3         | 2 | HDGFRP3  | 0.611590933 | 2.100154046 | 1.643482033 |
| PDLIM2          | 2 | PDLIM2   | 0.379824617 | 2.063269391 | 1.637197676 |
| SNRPD1          | 3 | SNRPD1   | 0.972322932 | 2.063131456 | 1.622530796 |
| PSMG1           | 3 | PSMG1    | 0.623461102 | 2.034672973 | 1.617898359 |
| ALDH3B1         | 7 | ALDH3B1  | 0.338584627 | 2.02824795  | 1.612389492 |
| NUP160          | 8 | NUP160   | 0.538291254 | 2.019003333 | 1.566850797 |

|               |    |         |             |             |             |
|---------------|----|---------|-------------|-------------|-------------|
| IQGAP3        | 2  | IQGAP3  | 0.102506095 | 2.016445701 | 1.560651705 |
| CHAMP1        | 2  | CHAMP1  | 0.773945802 | 2.00629286  | 1.553702424 |
| ZNF598        | 2  | ZNF598  | 0.544675592 | 1.988715171 |             |
| CTR9          | 2  | CTR9    | 0.58282293  | 1.986533603 |             |
| PTP4A1;PTP4A2 | 2  | PTP4A1  | 0.551708342 | 1.962856709 |             |
| CARM1         | 5  | CARM1   | 0.704666074 | 1.961731068 |             |
| MKI67         | 17 | MKI67   | 0.941707437 | 1.956037052 |             |
| GALNS         | 3  | GALNS   | 0.311285711 | 1.939545574 |             |
| KDM3B         | 4  | KDM3B   | 0.495602577 | 1.934867804 |             |
| BRIX1         | 5  | BRIX1   | 1.681591641 | 1.902747877 |             |
| DDRGK1        | 2  | DDRGK1  | 0.706158884 | 1.899815292 |             |
| LIMCH1        | 4  | LIMCH1  | 0.536981814 | 1.885896401 |             |
| IKBKB         | 2  | IKBKB   | 0.329165799 | 1.876402286 |             |
| LMCD1         | 9  | LMCD1   | 0.565800031 | 1.873963908 |             |
| SLC33A1       | 3  | SLC33A1 | 0.68882025  | 1.870758123 |             |
| DAZAP1        | 5  | DAZAP1  | 0.920438454 | 1.86345679  |             |
| DNAJC9        | 6  | DNAJC9  | 1.275234552 | 1.85556703  |             |
| RPL10A        | 10 | RPL10A  | 1.028977246 | 1.855406174 |             |
| GMPPB         | 2  | GMPPB   | 0.756872724 | 1.853295979 |             |
| PSPC1         | 5  | PSPC1   | 1.607076467 | 1.84141812  |             |
| CFDP1         | 3  | CFDP1   | 0.469233397 | 1.832221423 |             |
| PREP          | 7  | PREP    | 0.718254441 | 1.820617965 |             |
| DHODH         | 5  | DHODH   | 0.702472446 | 1.80266302  |             |
| EMC4          | 2  | EMC4    | 0.70643321  | 1.797687509 |             |
| VPS28         | 4  | VPS28   | 0.60481214  | 1.789914079 |             |
| MKKS          | 2  | MKKS    | 0.849133549 | 1.785730806 |             |

|                       |    |          |             |             |
|-----------------------|----|----------|-------------|-------------|
| SIL1                  | 3  | SIL1     | 0.469770679 | 1.785520011 |
| HIRIP3                | 3  | HIRIP3   | 0.382735541 | 1.784285413 |
| PSMD8                 | 4  | PSMD8    | 0.774256566 | 1.764557463 |
| DNMT1                 | 4  | DNMT1    | 1.248847317 | 1.763298216 |
| SLC7A5                | 6  | SLC7A5   | 0.651320935 | 1.757524534 |
| PPWD1                 | 4  | PPWD1    | 0.784599863 | 1.744710757 |
| NQO2                  | 3  | NQO2     | 0.620421754 | 1.737058657 |
| DIMT1                 | 5  | DIMT1    | 1.395863091 | 1.726583853 |
| IKBIP                 | 5  | Q70UQ0-4 | 0.807187085 | 1.723676404 |
| CYP51A1               | 4  | CYP51A1  | 0.40511068  | 1.707221808 |
| SEC23B                | 4  | SEC23B   | 0.460363742 | 1.69139259  |
| SRSF5                 | 2  | SRSF5    | 0.854322635 | 1.689302137 |
| CDK2;CDK3             | 3  | CDK2     | 0.714776236 | 1.680526401 |
| LDAH;C2orf43;FLJ21820 | 2  | LDAH     | 0.706746369 | 1.668307103 |
| SYVN1                 | 3  | SYVN1    | 0.386448771 | 1.661354054 |
| HSPA1B;HSPA1A         | 15 | HSPA1B   | 1.023541362 | 1.660523758 |
| YBX1                  | 6  | YBX1     | 0.819628574 | 1.659968599 |
| AP3S1                 | 2  | AP3S1    | 0.76963047  | 1.653563636 |
| POLRMT                | 2  | POLRMT   | 0.418574165 | 1.644907817 |
| HADH                  | 6  | HADH     | 0.837622612 | 1.64034885  |
| TMEM167A              | 2  | TMEM167A | 0.54979922  | 1.63825998  |
| IKBKG                 | 3  | IKBKG    | 0.593803134 | 1.638169282 |
| PCCA                  | 4  | PCCA     | 1.011025318 | 1.635834579 |
| LARP7                 | 2  | LARP7    | 1.128120794 | 1.630956207 |
| RFC4                  | 5  | RFC4     | 0.820710068 | 1.630710744 |
| ABHD10                | 4  | ABHD10   | 0.912531373 | 1.629744408 |

|         |    |         |             |             |
|---------|----|---------|-------------|-------------|
| PLCH1   | 2  | PLCH1   | 1.019789283 | 1.629635853 |
| EXOSC8  | 3  | EXOSC8  | 0.863537933 | 1.624108262 |
| LYPLAL1 | 4  | LYPLAL1 | 0.882736003 | 1.621594063 |
| SMARCC1 | 3  | SMARCC1 | 0.585174723 | 1.617468967 |
| YBX3    | 2  | YBX3    | 0.622261986 | 1.61268073  |
| CDC73   | 8  | CDC73   | 0.58045319  | 1.612074381 |
| LAMB1   | 5  | LAMB1   | 0.758474027 | 1.611954327 |
| ESD     | 6  | ESD     | 0.782728919 | 1.606574546 |
| VPS52   | 2  | VPS52   | 0.429302762 | 1.603762571 |
| LAMP2   | 5  | LAMP2   | 0.607490012 | 1.603298504 |
| PABPC4  | 10 | PABPC4  | 0.65467952  | 1.602358752 |
| THEM6   | 7  | THEM6   | 0.715549003 | 1.585398275 |
| CDS2    | 3  | CDS2    | 0.772716284 | 1.585196419 |
| SNAP23  | 4  | SNAP23  | 0.897690457 | 1.581908488 |
| OGT     | 6  | OGT     | 0.61798311  | 1.581161991 |
| DCPS    | 8  | DCPS    | 0.720133594 | 1.578764678 |
| SF3A3   | 9  | SF3A3   | 0.962270446 | 1.577212198 |
| UBE2I   | 6  | UBE2I   | 1.170788064 | 1.569029123 |
| GCLM    | 5  | GCLM    | 0.742845815 | 1.566086734 |
| GRPEL1  | 3  | GRPEL1  | 1.021442061 | 1.563669187 |
| ACOX1   | 6  | ACOX1   | 0.890236977 | 1.559582149 |

**Downregulated proteins by Compound 1 (Number: 298)**

|        |    |        |             |             |
|--------|----|--------|-------------|-------------|
| GBE1   | 10 | GBE1   | 0.885447811 | 0.666140846 |
| ARL1   | 2  | ARL1   | 1.311104416 | 0.664318923 |
| ADAR   | 20 | ADAR   | 1.270068676 | 0.663826357 |
| PPP4R2 | 4  | PPP4R2 | 1.604296455 | 0.662945233 |



|                 |    |          |             |             |
|-----------------|----|----------|-------------|-------------|
| ITGB1           | 16 | ITGB1    | 0.840994866 | 0.662080499 |
| ERLIN2          | 7  | ERLIN2   | 0.962135196 | 0.661039096 |
| TAF15           | 6  | TAF15    | 1.063868775 | 0.659692744 |
| BCAP31          | 15 | BCAP31   | 1.134251186 | 0.656448089 |
| C5orf51         | 2  | C5orf51  | 0.644017854 | 0.655419903 |
| ERO1L           | 12 | ERO1L    | 1.100579036 | 0.655367398 |
| OAS3            | 10 | OAS3     | 1.541990353 | 0.655075355 |
| NDUFS5          | 4  | NDUFS5   | 0.74826907  | 0.6535495   |
| WDR75           | 3  | WDR75    | 2.431160492 | 0.65284129  |
| ATP6V1A         | 10 | ATP6V1A  | 1.072559508 | 0.652811412 |
| CYP24A1         | 7  | CYP24A1  | 0.089175286 | 0.65262416  |
| ACBD3           | 6  | ACBD3    | 1.232145476 | 0.652280069 |
| FERMT2          | 8  | FERMT2   | 1.108513288 | 0.652116587 |
| IDI1            | 6  | IDI1     | 0.538169815 | 0.651689102 |
| KDELRL1;KDELRL2 | 2  | KDELRL1  | 1.102624937 | 0.649165146 |
| CNN3            | 5  | CNN3     | 1.257945284 | 0.64903705  |
| SBDS            | 8  | SBDS     | 1.293331308 | 0.648402631 |
| SMAP1           | 2  | SMAP1    | 1.152837387 | 0.647918821 |
| HIST1H1D        | 5  | HIST1H1D | 3.031549262 | 0.647244255 |
| RRP1            | 3  | RRP1     | 1.778797517 | 0.646145478 |
| EHD1            | 11 | EHD1     | 1.329165494 | 0.64554754  |
| CHMP5           | 4  | CHMP5    | 1.241583716 | 0.644909527 |
| TMEM179B        | 2  | TMEM179B | 0.624417412 | 0.643715193 |
| AP1M1           | 7  | AP1M1    | 1.36524257  | 0.640381109 |
| TGM2            | 23 | TGM2     | 1.776769011 | 0.638010591 |
| TBC1D15         | 10 | TBC1D15  | 0.650948448 | 0.635900385 |

|              |    |         |             |             |
|--------------|----|---------|-------------|-------------|
| DDX20        | 2  | DDX20   | 0.647785959 | 0.635210624 |
| CNTN1        | 3  | CNTN1   | 0.602926917 | 0.634762748 |
| MAGED2       | 13 | MAGED2  | 0.977931205 | 0.634675879 |
| S100A16      | 5  | S100A16 | 0.926468297 | 0.634331035 |
| TCEAL4       | 2  | TCEAL4  | 0.493143109 | 0.632372979 |
| TIPRL        | 7  | TIPRL   | 0.964277657 | 0.63164093  |
| GSTK1        | 7  | GSTK1   | 0.99853729  | 0.631510198 |
| CNN2         | 8  | CNN2    | 0.892278019 | 0.630142516 |
| NDUFB9       | 4  | NDUFB9  | 0.581102554 | 0.629389361 |
| TPD52L1      | 2  | TPD52L1 | 1.239488901 | 0.626239673 |
| DENND4C      | 3  | DENND4C | 1.241082633 | 0.624715993 |
| SMC6         | 2  | SMC6    | 1.30518384  | 0.622010836 |
| NDUFA4       | 4  | NDUFA4  | 0.858532473 | 0.621893648 |
| PARP4        | 8  | PARP4   | 0.764250685 | 0.620746824 |
| UTP20        | 3  | UTP20   | 4.508549141 | 0.620658089 |
| STUB1        | 3  | STUB1   | 1.04427844  | 0.619907514 |
| NDUFB1       | 2  | NDUFB1  | 0.931497131 | 0.619318461 |
| TNFAIP2      | 12 | TNFAIP2 | 1.083219972 | 0.617592669 |
| HECTD1       | 2  | HECTD1  | 1.045675484 | 0.616385    |
| FAM136A      | 5  | FAM136A | 0.977181148 | 0.615965736 |
| SUMO1        | 5  | SUMO1   | 1.438900361 | 0.615772384 |
| RALA         | 4  | RALA    | 1.203527651 | 0.615663866 |
| VPS33B       | 3  | VPS33B  | 0.778003064 | 0.613990036 |
| RAB31;RAB22A | 2  | RAB31   | 1.340871523 | 0.612644399 |
| PIGU         | 2  | PIGU    | 0.863314689 | 0.609698657 |
| DNAJC3       | 3  | DNAJC3  | 1.345984113 | 0.609640098 |

|               |    |          |             |             |
|---------------|----|----------|-------------|-------------|
| NAMPT         | 13 | NAMPT    | 1.263565692 | 0.607045336 |
| SERPINB9      | 7  | SERPINB9 | 1.9192941   | 0.606167508 |
| CLPX          | 8  | CLPX     | 0.727774864 | 0.605771102 |
| UBE2T         | 2  | UBE2T    | 0.466761504 | 0.605114211 |
| UBLCP1        | 7  | UBLCP1   | 0.820598432 | 0.604975404 |
| YY2;YY1       | 2  | YY2      | 1.812445981 | 0.604541027 |
| JUP           | 16 | JUP      | 0.59211699  | 0.601185722 |
| PNPT1         | 10 | PNPT1    | 1.858902444 | 0.600876115 |
| LRPAP1        | 5  | LRPAP1   | 1.016903715 | 0.600755078 |
| ATP5EP2;ATP5E | 3  | ATP5EP2  | 1.407925697 | 0.596651714 |
| SEC62         | 3  | SEC62    | 1.065677327 | 0.596415111 |
| NR3C1         | 9  | NR3C1    | 0.921111595 | 0.593900688 |
| TMPO          | 13 | P42166   | 0.97813867  | 0.593018492 |
| CIAO1         | 4  | CIAO1    | 1.176516178 | 0.590021481 |
| PPP2R5C       | 2  | PPP2R5C  | 0.770434384 | 0.588838816 |
| DNAJA1        | 10 | DNAJA1   | 1.885383403 | 0.588471754 |
| LMAN2         | 4  | LMAN2    | 1.016202455 | 0.585552403 |
| SDCBP         | 3  | SDCBP    | 0.738483495 | 0.583561356 |
| GFPT2         | 4  | GFPT2    | 1.735596866 | 0.583451359 |
| CCDC55;NSRP1  | 3  | CCDC55   | 1.225723753 | 0.5820583   |
| SLC30A1       | 2  | SLC30A1  | 1.452895628 | 0.581922315 |
| RANBP3        | 4  | RANBP3   | 1.210481883 | 0.578109281 |
| CD99          | 2  | CD99     | 0.796213526 | 0.577674283 |
| SAP18         | 4  | SAP18    | 1.454603827 | 0.57715446  |
| CHMP2B        | 5  | CHMP2B   | 1.368741044 | 0.57630229  |
| PDCD4         | 3  | PDCD4    | 0.265516398 | 0.575063238 |

|                  |    |         |             |             |
|------------------|----|---------|-------------|-------------|
| HMGCS1           | 14 | HMGCS1  | 0.395909121 | 0.574664834 |
| PLD3             | 3  | PLD3    | 0.392513803 | 0.573877946 |
| BZW1             | 12 | BZW1    | 1.191685838 | 0.572543236 |
| PLA2G4A          | 8  | PLA2G4A | 0.983345449 | 0.571540416 |
| VPS4B            | 4  | VPS4B   | 1.383518779 | 0.571247211 |
| RRM2B            | 2  | RRM2B   | 1.092963437 | 0.570546942 |
| OCIAD2           | 6  | OCIAD2  | 0.675332855 | 0.569276043 |
| TMEM2            | 3  | TMEM2   | 0.610866753 | 0.567781164 |
| POLD1            | 10 | POLD1   | 0.753962757 | 0.567160105 |
| GLG1             | 15 | GLG1    | 0.65397199  | 0.565122412 |
| NUCB2;Nucb2      | 5  | NUCB2   | 0.855805317 | 0.563110564 |
| NDUFS3           | 8  | NDUFS3  | 0.905687915 | 0.56236475  |
| PTGFRN           | 2  | PTGFRN  | 0.67261828  | 0.561769867 |
| HELZ2            | 3  | HELZ2   | 6.515608213 | 0.561705284 |
| FUBP3            | 6  | FUBP3   | 1.284924671 | 0.55926454  |
| ARFGAP2          | 4  | ARFGAP2 | 0.70741371  | 0.558635416 |
| NUDT4            | 3  | NUDT4   | 0.54451316  | 0.55815794  |
| DSP              | 16 | DSP     | 1.50902654  | 0.556477537 |
| HSPB1            | 12 | HSPB1   | 0.810817868 | 0.555422648 |
| PXN              | 10 | PXN     | 1.28992735  | 0.554975483 |
| DPY30            | 2  | DPY30   | 5.621647122 | 0.554403961 |
| COX6B1           | 6  | COX6B1  | 0.802358252 | 0.553249037 |
| TMEM263          | 2  | TMEM263 | 0.513198988 | 0.553125206 |
| TMA7;hCG_2014768 | 3  | TMA7    | 1.599323611 | 0.552290827 |
| BTF3             | 3  | BTF3    | 1.498693464 | 0.55212563  |
| IDH3B            | 8  | IDH3B   | 0.969192173 | 0.551843641 |

|                                |    |          |             |             |
|--------------------------------|----|----------|-------------|-------------|
| ABCF3                          | 4  | ABCF3    | 0.51059413  | 0.551819539 |
| UBE2H                          | 2  | UBE2H    | 0.97786576  | 0.548127588 |
| MINOS1;MINOS1-NBL1             | 2  | MINOS1   | 1.208485628 | 0.546502533 |
| RNF114                         | 2  | RNF114   | 1.183252139 | 0.544312112 |
| NDUFS4                         | 2  | NDUFS4   | 0.869149203 | 0.543332249 |
| MIF                            | 3  | MIF      | 1.132913817 | 0.541658617 |
| NDUFV1                         | 9  | NDUFV1   | 0.843166644 | 0.537209114 |
| PELO                           | 4  | PELO     | 1.175438858 | 0.534909938 |
| S100P                          | 2  | S100P    | 1.984231505 | 0.533198156 |
| PML                            | 4  | PML      | 2.200882704 | 0.530609922 |
| GRSF1                          | 3  | GRSF1    | 0.523769968 | 0.529142285 |
| GIT1                           | 4  | GIT1     | 1.335058185 | 0.529130095 |
| NDUFC2                         | 3  | NDUFC2   | 0.931754638 | 0.527353943 |
| NDUFS1                         | 21 | NDUFS1   | 0.859536172 | 0.525898482 |
| LGMN                           | 2  | LGMN     | 0.390581592 | 0.525346082 |
| EHD4                           | 9  | EHD4     | 1.482851755 | 0.524703536 |
| C17orf49;RNASEK-C17orf49;BAP18 | 3  | C17orf49 | 0.274640731 | 0.523991073 |
| MRPS31                         | 5  | MRPS31   | 0.687719866 | 0.523831845 |
| NDUFB3                         | 2  | NDUFB3   | 0.811997655 | 0.518538221 |
| SDF4                           | 4  | SDF4     | 0.646949742 | 0.517897849 |
| KPNA2                          | 12 | KPNA2    | 1.498768624 | 0.517379828 |
| AKT1                           | 3  | AKT1     | 0.750625985 | 0.517189649 |
| ITGA5                          | 2  | ITGA5    | 1.404313887 | 0.516050157 |
| MYBBP1A                        | 26 | MYBBP1A  | 1.32298211  | 0.513093031 |
| MRPS18B                        | 2  | MRPS18B  | 0.584251034 | 0.508675665 |
| CPD                            | 7  | CPD      | 0.760805345 | 0.506267423 |

|         |    |         |             |             |
|---------|----|---------|-------------|-------------|
| CLPTM1L | 2  | CLPTM1L | 1.012478128 | 0.50589096  |
| NDUFA2  | 6  | NDUFA2  | 0.873449473 | 0.505726978 |
| RBMS2   | 2  | RBMS2   | 1.08887251  | 0.505377091 |
| NLRP2   | 6  | NLRP2   | 0.424414177 | 0.504703349 |
| RRP12   | 11 | RRP12   | 1.373565497 | 0.502441628 |
| NDUFA5  | 4  | NDUFA5  | 0.778426666 | 0.500553751 |
| TRIM25  | 10 | TRIM25  | 0.652137174 | 0.500291621 |
| MAPK15  | 2  | MAPK15  | 1.375375122 | 0.49293024  |
| RPL37   | 3  | RPL37   | 2.600760152 | 0.492328491 |
| CA12    | 4  | CA12    | 0.618763949 | 0.490847519 |
| SNX3    | 8  | SNX3    | 0.906121154 | 0.490193028 |
| RBM3    | 5  | RBM3    | 0.604343412 | 0.488843562 |
| MRPL38  | 5  | MRPL38  | 0.662899781 | 0.488534701 |
| LAP3    | 18 | LAP3    | 2.190660494 | 0.485220369 |
| MRPL18  | 2  | MRPL18  | 0.59402002  | 0.484864578 |
| AGR2    | 5  | AGR2    | 1.427527932 | 0.48307749  |
| MPP5    | 2  | MPP5    | 0.865639424 | 0.481833471 |
| ASMTL   | 4  | ASMTL   | 1.058308937 | 0.479066665 |
| DSG2    | 6  | DSG2    | 1.407135461 | 0.478008612 |
| AQR     | 2  | AQR     | 0.871527698 | 0.476940952 |
| ENSA    | 4  | ENSA    | 1.03195319  | 0.473958316 |
| IPO4    | 15 | IPO4    | 0.79513467  | 0.469442764 |
| NDUFS2  | 6  | NDUFS2  | 0.881388571 | 0.467595217 |
| MRPS2   | 7  | MRPS2   | 0.591367619 | 0.462226293 |
| AFAP1L2 | 2  | AFAP1L2 | 1.029096055 | 0.459172729 |
| RSAD2   | 10 | RSAD2   | 3.434645105 | 0.457500499 |

|              |    |          |             |             |             |
|--------------|----|----------|-------------|-------------|-------------|
| YTHDC1       | 3  | YTHDC1   | 1.814230377 | 0.457436449 |             |
| NDUFS6       | 3  | NDUFS6   | 0.920757    | 0.45400438  |             |
| NDUFA12      | 4  | NDUFA12  | 1.035010321 | 0.453157277 |             |
| B2M          | 2  | B2M      | 2.161880224 | 0.453007488 |             |
| EPHA2        | 11 | EPHA2    | 2.133838081 | 0.452896923 |             |
| MRPL47       | 5  | MRPL47   | 0.472505265 | 0.452663356 |             |
| MTUS1        | 6  | MTUS1    | 0.600170681 | 0.452631484 |             |
| SAMHD1       | 9  | SAMHD1   | 1.922100343 | 0.447088051 |             |
| TGOLN2       | 4  | TGOLN2   | 0.386238485 | 0.445870903 |             |
| LGALS3BP     | 6  | LGALS3BP | 1.880551004 | 0.444846632 |             |
| CRYZL1       | 2  | CRYZL1   | 1.119934201 | 0.443546202 |             |
| DAP3         | 6  | DAP3     | 0.55629526  | 0.440561407 |             |
| FANCI        | 5  | FANCI    | 1.000168384 | 0.433436692 |             |
| IFT80;TRIM59 | 2  | IFT80    | 9.749575416 | 0.433301601 |             |
| MRPL19       | 4  | MRPL19   | 0.709869968 | 0.431321898 |             |
| CASP8        | 5  | CASP8    | 0.776151555 | 0.426793651 |             |
| DTX3L        | 2  | DTX3L    | 1.830667339 | 0.425072959 |             |
| STAT3        | 8  | STAT3    | 0.760092065 | 0.424672053 | 0.665798311 |
| NUB1         | 2  | NUB1     | 0.803156424 | 0.422171269 | 0.665084236 |
| MRPL21       | 2  | MRPL21   | 0.664016522 | 0.41641198  | 0.664795898 |
| MRPS6        | 4  | MRPS6    | 0.947671394 | 0.415643581 | 0.663895784 |
| CDC2;CDK1    | 7  | CDC2     | 0.660843858 | 0.414266976 | 0.663725983 |
| OGFR         | 7  | OGFR     | 1.583578244 | 0.410570152 | 0.662982085 |
| PRNP         | 2  | PRNP     | 0.702354987 | 0.410161763 | 0.661680295 |
| WARS         | 20 | WARS     | 3.049295724 | 0.409514241 | 0.661449642 |
| BRAT1        | 2  | BRAT1    | 0.861255936 | 0.408472843 | 0.660749402 |

|                             |    |            |             |             |             |
|-----------------------------|----|------------|-------------|-------------|-------------|
| UBE2G1                      | 2  | UBE2G1     | 2.882185952 | 0.406358844 | 0.658498825 |
| NDUFB8                      | 2  | NDUFB8     | 0.711445714 | 0.405789325 | 0.654024627 |
| UBE3C                       | 3  | UBE3C      | 1.095924393 | 0.404608564 | 0.652754952 |
| MRPL44                      | 3  | MRPL44     | 0.551589963 | 0.401987147 | 0.649515478 |
| AAMP                        | 2  | AAMP       | 0.942125079 | 0.39910945  | 0.645972897 |
| MAP1LC3B;MAP1LC3B2;MAP1LC3A | 2  | MAP1LC3B   | 3.13115664  | 0.398924101 | 0.644653072 |
| NMI                         | 3  | NMI        | 1.2005914   | 0.394301089 | 0.644592424 |
| FAM208A                     | 3  | FAM208A    | 0.825446688 | 0.393161591 | 0.644326405 |
| GSTM3                       | 3  | GSTM3      | 1.070265254 | 0.392655857 | 0.643178037 |
| EARS2                       | 6  | EARS2      | 0.84380997  | 0.392375823 | 0.638452862 |
| NDUFA10                     | 8  | NDUFA10    | 0.745094967 | 0.391728779 | 0.638407624 |
| MRPS22                      | 8  | MRPS22     | 0.685620535 | 0.3896581   | 0.638205338 |
| MRPS23                      | 2  | MRPS23     | 0.832695198 | 0.387071969 | 0.63761458  |
| GADD45GIP1                  | 2  | GADD45GIP1 | 0.594479341 | 0.3861962   | 0.636746267 |
| PRMT3                       | 6  | PRMT3      | 1.400726696 | 0.384295804 | 0.629032258 |
| TSR2                        | 2  | TSR2       | 0.836054046 | 0.383435499 | 0.626348085 |
| GULP1                       | 2  | GULP1      | 0.575953322 | 0.381613558 | 0.623967774 |
| HCCS                        | 2  | HCCS       | 3.813782999 | 0.381239805 | 0.617660475 |
| NDUFS8                      | 4  | NDUFS8     | 1.024792805 | 0.380612537 | 0.616872592 |
| NDUFA7                      | 2  | NDUFA7     | 0.888705137 | 0.378972964 | 0.616408619 |
| TRAM1                       | 6  | TRAM1      | 0.980316712 | 0.378434323 | 0.614710738 |
| AGPAT5                      | 3  | AGPAT5     | 1.265989699 | 0.377063744 | 0.6137739   |
| PHLDA2                      | 2  | PHLDA2     | 2.435677726 | 0.375611322 | 0.61375761  |
| NDUFA13                     | 5  | NDUFA13    | 1.087272394 | 0.37514718  | 0.606503946 |
| ZC3HAV1                     | 21 | ZC3HAV1    | 2.59416205  | 0.372786423 | 0.600887984 |
| EIF1;EIF1B                  | 3  | EIF1       | 0.779662908 | 0.362161509 | 0.600482603 |



|                         |    |          |             |             |             |
|-------------------------|----|----------|-------------|-------------|-------------|
| SUSD2                   | 2  | SUSD2    | 0.460816892 | 0.360430076 | 0.598130528 |
| ITGA2                   | 5  | ITGA2    | 1.486854549 | 0.358794634 | 0.592716943 |
| PTCD3                   | 4  | PTCD3    | 0.495700049 | 0.351335199 | 0.591892527 |
| USP24                   | 3  | USP24    | 1.437850609 | 0.346846292 | 0.591657124 |
| CUX1                    | 2  | CUX1     | 1.381337376 | 0.344506815 | 0.591376852 |
| BCL10                   | 3  | BCL10    | 1.380985947 | 0.339853894 | 0.589925214 |
| MRPL22                  | 2  | MRPL22   | 0.693467946 | 0.339576302 | 0.589047156 |
| PDXDC1                  | 8  | PDXDC1   | 1.04074407  | 0.339441616 | 0.58569752  |
| CHCHD2;CHCHD2P9         | 3  | CHCHD2   | 1.065159813 | 0.336550048 | 0.583268022 |
| CXorf38                 | 2  | CXorf38  | 2.58293731  | 0.33279555  | 0.580507268 |
| IFIT5                   | 3  | IFIT5    | 1.055734762 | 0.330907956 | 0.580032526 |
| WDR55                   | 3  | WDR55    | 0.969278948 | 0.326836526 | 0.577002635 |
| MRPL24                  | 3  | MRPL24   | 0.57023427  | 0.325029541 | 0.576966702 |
| GHITM                   | 4  | GHITM    | 0.607116725 | 0.322027959 | 0.575942493 |
| GOPC                    | 2  | GOPC     | 2.581445744 | 0.313632832 | 0.567774046 |
| NFKB2                   | 7  | NFKB2    | 1.812224981 | 0.31114312  | 0.564487172 |
| SCD                     | 2  | SCD      | 0.086394161 | 0.309539877 | 0.562388445 |
| MSRA                    | 2  | MSRA     | 1.013209521 | 0.300915608 | 0.561379049 |
| NDUFB4                  | 2  | NDUFB4   | 0.835248373 | 0.296172791 | 0.560849692 |
| SULT1A4;SULT1A3;SULT1A1 | 5  | SULT1A4  | 0.784979248 | 0.28857158  | 0.560564936 |
| CRELD2                  | 2  | CRELD2   | 0.841962839 | 0.282461119 | 0.55785816  |
| IRF9                    | 2  | IRF9     | 1.749790347 | 0.282237676 | 0.555962631 |
| PTGS2                   | 11 | PTGS2    | 5.830992886 | 0.282198858 | 0.555952851 |
| C12orf57                | 4  | C12orf57 | 0.669988714 | 0.278439162 | 0.554170967 |
| HERC4                   | 3  | HERC4    | 0.791913954 | 0.274652098 | 0.5517394   |
| STRA6                   | 2  | STRA6    | 0.609476133 | 0.27156632  | 0.551144653 |

|        |    |        |             |             |             |
|--------|----|--------|-------------|-------------|-------------|
| POLD2  | 3  | POLD2  | 0.788680872 | 0.269381333 | 0.551021618 |
| MRPL23 | 3  | MRPL23 | 0.4090822   | 0.26702656  | 0.549343568 |
| INTS3  | 3  | INTS3  | 1.242986103 | 0.266195305 | 0.549010177 |
| ZFP36  | 2  | ZFP36  | 19.40242954 | 0.26540432  | 0.547345737 |
| RNF213 | 47 | RNF213 | 0.988765628 | 0.264448877 | 0.546250182 |
| NFKB1  | 2  | NFKB1  | 1.923328148 | 0.263647724 | 0.539062827 |
| GLS    | 6  | GLS    | 0.464853744 | 0.258289162 | 0.53821667  |
| PZP    | 2  | PZP    | 1.213259992 | 0.252938982 | 0.537434411 |
| HLA-E  | 2  | HLA-E  | 2.368624568 | 0.241413679 | 0.53662846  |
| VEZT   | 2  | VEZT   | 134.8430744 | 0.240775302 | 0.535917313 |
| PTDSS1 | 4  | PTDSS1 | 1.910190802 | 0.238419593 | 0.520649057 |
| JUNB   | 2  | JUNB   | 2.811559088 | 0.235226479 | 0.520558686 |
| DHCR7  | 7  | DHCR7  | 0.405684707 | 0.229934241 | 0.519270711 |
| VPS36  | 4  | VPS36  | 0.726482526 | 0.225089334 | 0.518606845 |
| UBE2L6 | 2  | UBE2L6 | 1.611984832 | 0.218466712 | 0.518482152 |
| SEL1L  | 2  | SEL1L  | 0.826509539 | 0.217637423 | 0.515277544 |
| IFI35  | 3  | IFI35  | 3.463234936 | 0.216046128 | 0.514242993 |
| TIAL1  | 2  | TIAL1  | 0.8089979   | 0.206904257 | 0.509497704 |
| LACTB  | 5  | LACTB  | 0.738915761 | 0.203657235 | 0.509180066 |
| MSMO1  | 2  | MSMO1  | 0.428965847 | 0.20342458  | 0.506426032 |
| POMP   | 2  | POMP   | 1.087241721 | 0.194082381 | 0.499713561 |
| FADS2  | 5  | FADS2  | 0.014932883 | 0.193520401 | 0.494410183 |
| CD55   | 2  | CD55   | 1.877405052 | 0.190184508 | 0.492061426 |
| HLA-B  | 2  | Q2L6G2 | 9.255838534 | 0.186989407 | 0.487593166 |
| LMF2   | 2  | LMF2   | 1.336610137 | 0.175045474 | 0.487142625 |
| TAP1   | 7  | TAP1   | 4.166435057 | 0.169680707 | 0.483589409 |

|         |    |         |             |             |             |
|---------|----|---------|-------------|-------------|-------------|
| AIDA    | 2  | AIDA    | 1.661823668 | 0.163680933 | 0.480127088 |
| MRPL37  | 8  | MRPL37  | 0.477335165 | 0.160196784 | 0.475701417 |
| NXF1    | 2  | NXF1    | 1.135412984 | 0.154474174 | 0.473516999 |
| GBP1    | 2  | GBP1    | 3.974316677 | 0.154165716 | 0.464060824 |
| ZFP36L1 | 2  | ZFP36L1 | 4.224953455 | 0.147588855 | 0.461828631 |
| CHID1   | 2  | CHID1   | 1.330154199 | 0.146557606 | 0.452635259 |
| MAFF    | 3  | MAFF    | 3.875398584 | 0.139267511 | 0.451269037 |
| SAMD9   | 2  | SAMD9   | 7.009919972 | 0.136668757 | 0.44154585  |
| FDFT1   | 9  | FDFT1   | 0.194068963 | 0.136410488 | 0.4377276   |
| MRPS21  | 2  | MRPS21  | 0.926369847 | 0.127915616 | 0.435864491 |
| GPX8    | 3  | GPX8    | 1.321061879 | 0.124709991 | 0.435641506 |
| EIF1AY  | 2  | EIF1AY  | 1.65619681  | 0.117152512 | 0.426088643 |
| APOL2   | 8  | APOL2   | 5.217365274 | 0.115069711 | 0.419933923 |
| TRIM21  | 3  | TRIM21  | 1.982081309 | 0.111527612 | 0.412288758 |
| IFI16   | 4  | IFI16   | 7.934035532 | 0.099582165 | 0.402339328 |
| NT5C3A  | 7  | NT5C3A  | 6.868700799 | 0.093653685 | 0.397367377 |
| UBE2S   | 4  | UBE2S   | 1.414362253 | 0.092467352 | 0.394778409 |
| LIMA1   | 2  | LIMA1   | 1.825496763 | 0.090244791 | 0.375561542 |
| NEB     | 3  | NEB     | 26.07065879 | 0.082055867 | 0.36893342  |
| ARPP19  | 2  | ARPP19  | 1.033896571 | 0.065462088 | 0.360977318 |
| NUCB1   | 14 | NUCB1   | 0.585333772 | 0.064138202 | 0.358959151 |
| ISG20   | 2  | ISG20   | 18.63910532 | 0.062937345 | 0.341222925 |
| PLAUR   | 3  | PLAUR   | 24.66865392 | 0.054873278 | 0.337331291 |
| ISG15   | 7  | ISG15   | 474.2451443 | 0.050521826 | 0.332020186 |
| CENPF   | 2  | CENPF   | 1.756731763 | 0.047549731 | 0.305031331 |
| DDX58   | 13 | DDX58   | 16.34520759 | 0.040617565 | 0.28747866  |

|        |    |        |             |             |             |
|--------|----|--------|-------------|-------------|-------------|
| HERC5  | 11 | HERC5  | 37.05493772 | 0.039155656 | 0.286787011 |
| IFIT1  | 16 | IFIT1  | 93.01794185 | 0.035385391 | 0.246011891 |
| OASL   | 18 | OASL   | 76.25999546 | 0.024750595 | 0.181035056 |
| MRPL14 | 2  | MRPL14 | 0.693115589 | 0.021932152 | 0.098596208 |
| MX1    | 15 | MX1    | 85.20509118 | 0.006292461 | 0.095852461 |
| IFIT3  | 13 | IFIT3  | 269.7862583 | 0.004540579 | 0.08008024  |
| IFIT2  | 17 | IFIT2  | 649.560989  | 0.003790188 | 0.031540097 |
| BAZ1A  | 3  | BAZ1A  | 9.119539669 | 0.002043703 | 0.001608679 |

**Table S4 All of the detailed parameters of target proteins obviously decreased or increased among experimental groups in influenza A-infected A549 cell model**

| ID         | Pathway name                                           | GeneRatio | pvalue   | qvalue   | Count | type               |
|------------|--------------------------------------------------------|-----------|----------|----------|-------|--------------------|
| GO:0006120 | mitochondrial electron transport, NADH to ubiquinone   | 21 367    | 2.85E-22 | 1.07E-18 | 21    | Biological process |
| GO:0042775 | mitochondrial ATP synthesis coupled electron transport | 24 367    | 1.03E-19 | 1.68E-16 | 24    | Biological process |
| GO:0042773 | ATP synthesis coupled electron transport               | 24 367    | 1.34E-19 | 1.68E-16 | 24    | Biological process |
| GO:0022904 | respiratory electron transport chain                   | 25 367    | 5.75E-19 | 5.39E-16 | 25    | Biological process |
| GO:0010257 | NADH dehydrogenase complex assembly                    | 20 367    | 1.16E-18 | 7.24E-16 | 20    | Biological process |
| GO:0032981 | mitochondrial respiratory chain complex I assembly     | 20 367    | 1.16E-18 | 7.24E-16 | 20    | Biological process |
| GO:0006119 | oxidative phosphorylation                              | 26 367    | 2.48E-18 | 1.33E-15 | 26    | Biological process |
| GO:0022900 | electron transport chain                               | 28 367    | 8.15E-17 | 3.82E-14 | 28    | Biological process |
| GO:0070125 | mitochondrial translational elongation                 | 20 367    | 9.07E-16 | 3.78E-13 | 20    | Biological process |
| GO:0045333 | cellular respiration                                   | 27 367    | 1.16E-15 | 4.33E-13 | 27    | Biological process |
| GO:0070126 | mitochondrial translational termination                | 20 367    | 1.46E-15 | 4.97E-13 | 20    | Biological process |
| GO:0046034 | ATP metabolic process                                  | 32 367    | 4.07E-15 | 1.27E-12 | 32    | Biological process |
| GO:0033108 | mitochondrial respiratory chain complex assembly       | 20 367    | 1.06E-14 | 3.06E-12 | 20    | Biological process |
| GO:0015980 | energy derivation by oxidation of organic compounds    | 31 367    | 2.20E-14 | 5.59E-12 | 31    | Biological process |
| GO:0009144 | purine nucleoside triphosphate metabolic process       | 33 367    | 2.30E-14 | 5.59E-12 | 33    | Biological process |
| GO:0006415 | translational termination                              | 20 367    | 2.39E-14 | 5.59E-12 | 20    | Biological process |
| GO:0009141 | nucleoside triphosphate metabolic process              | 34 367    | 2.53E-14 | 5.59E-12 | 34    | Biological process |
| GO:0032543 | mitochondrial translation                              | 22 367    | 2.95E-14 | 6.15E-12 | 22    | Biological process |

|            |                                                       |        |          |          |    |                    |
|------------|-------------------------------------------------------|--------|----------|----------|----|--------------------|
| GO:0009205 | purine ribonucleoside triphosphate metabolic process  | 32 367 | 7.34E-14 | 1.45E-11 | 32 | Biological process |
| GO:0009199 | ribonucleoside triphosphate metabolic process         | 32 367 | 1.25E-13 | 2.35E-11 | 32 | Biological process |
| GO:0009161 | ribonucleoside monophosphate metabolic process        | 33 367 | 1.33E-13 | 2.38E-11 | 33 | Biological process |
| GO:0140053 | mitochondrial gene expression                         | 23 367 | 1.40E-13 | 2.39E-11 | 23 | Biological process |
| GO:0009167 | purine ribonucleoside monophosphate metabolic process | 32 367 | 2.51E-13 | 4.09E-11 | 32 | Biological process |
| GO:0009126 | purine nucleoside monophosphate metabolic process     | 32 367 | 2.73E-13 | 4.27E-11 | 32 | Biological process |
| GO:0009123 | nucleoside monophosphate metabolic process            | 33 367 | 4.95E-13 | 7.43E-11 | 33 | Biological process |
| GO:0006414 | translational elongation                              | 20 367 | 5.05E-12 | 7.29E-10 | 20 | Biological process |
| GO:0032984 | protein-containing complex disassembly                | 29 367 | 1.96E-11 | 2.73E-09 | 29 | Biological process |
| GO:1903901 | negative regulation of viral life cycle               | 15 367 | 7.10E-11 | 9.52E-09 | 15 | Biological process |
| GO:0048525 | negative regulation of viral process                  | 16 367 | 1.09E-10 | 1.41E-08 | 16 | Biological process |
| GO:0051607 | defense response to virus                             | 23 367 | 3.13E-10 | 3.91E-08 | 23 | Biological process |
| GO:0043624 | cellular protein complex disassembly                  | 22 367 | 4.76E-10 | 5.76E-08 | 22 | Biological process |
| GO:0019058 | viral life cycle                                      | 27 367 | 5.72E-10 | 6.70E-08 | 27 | Biological process |
| GO:1903900 | regulation of viral life cycle                        | 17 367 | 3.82E-09 | 4.34E-07 | 17 | Biological process |
| GO:0060337 | type I interferon signaling pathway                   | 14 367 | 4.10E-09 | 4.39E-07 | 14 | Biological process |
| GO:0071357 | cellular response to type I interferon                | 14 367 | 4.10E-09 | 4.39E-07 | 14 | Biological process |
| GO:0034340 | response to type I interferon                         | 14 367 | 8.52E-09 | 8.87E-07 | 14 | Biological process |
| GO:0045071 | negative regulation of viral genome replication       | 11 367 | 1.42E-08 | 1.44E-06 | 11 | Biological process |
| GO:0009615 | response to virus                                     | 24 367 | 3.60E-08 | 3.55E-06 | 24 | Biological process |
| GO:0050792 | regulation of viral process                           | 18 367 | 1.53E-07 | 1.47E-05 | 18 | Biological process |

|            |                                                                            |        |          |          |    |                    |
|------------|----------------------------------------------------------------------------|--------|----------|----------|----|--------------------|
| GO:0045540 | regulation of cholesterol biosynthetic process                             | 9 367  | 1.60E-07 | 1.50E-05 | 9  | Biological process |
| GO:0051701 | interaction with host                                                      | 18 367 | 4.60E-07 | 4.20E-05 | 18 | Biological process |
| GO:0043901 | negative regulation of multi-organism process                              | 16 367 | 6.32E-07 | 5.64E-05 | 16 | Biological process |
| GO:1902930 | regulation of alcohol biosynthetic process                                 | 10 367 | 7.45E-07 | 6.50E-05 | 10 | Biological process |
| GO:0043903 | regulation of symbiosis, encompassing mutualism through parasitism         | 18 367 | 9.68E-07 | 8.25E-05 | 18 | Biological process |
| GO:0050810 | regulation of steroid biosynthetic process                                 | 11 367 | 1.01E-06 | 8.42E-05 | 11 | Biological process |
| GO:0006695 | cholesterol biosynthetic process                                           | 10 367 | 1.15E-06 | 9.41E-05 | 10 | Biological process |
| GO:0090181 | regulation of cholesterol metabolic process                                | 9 367  | 1.30E-06 | 0.000104 | 9  | Biological process |
| GO:1902653 | secondary alcohol biosynthetic process                                     | 10 367 | 1.52E-06 | 0.000119 | 10 | Biological process |
| GO:0045069 | regulation of viral genome replication                                     | 11 367 | 2.07E-06 | 0.000158 | 11 | Biological process |
| GO:0060333 | interferon-gamma-mediated signaling pathway                                | 11 367 | 2.31E-06 | 0.000174 | 11 | Biological process |
| GO:0019218 | regulation of steroid metabolic process                                    | 12 367 | 2.53E-06 | 0.000186 | 12 | Biological process |
| GO:0016126 | sterol biosynthetic process                                                | 10 367 | 2.94E-06 | 0.000212 | 10 | Biological process |
| GO:2001243 | negative regulation of intrinsic apoptotic signaling pathway               | 11 367 | 4.91E-06 | 0.000347 | 11 | Biological process |
| GO:0043900 | regulation of multi-organism process                                       | 23 367 | 8.09E-06 | 0.000562 | 23 | Biological process |
| GO:0008203 | cholesterol metabolic process                                              | 12 367 | 2.54E-05 | 0.001732 | 12 | Biological process |
| GO:0006636 | unsaturated fatty acid biosynthetic process                                | 7 367  | 2.68E-05 | 0.001795 | 7  | Biological process |
| GO:0019079 | viral genome replication                                                   | 11 367 | 2.79E-05 | 0.001833 | 11 | Biological process |
| GO:0046165 | alcohol biosynthetic process                                               | 12 367 | 3.65E-05 | 0.002359 | 12 | Biological process |
| GO:1903311 | regulation of mRNA metabolic process                                       | 18 367 | 3.73E-05 | 0.002371 | 18 | Biological process |
| GO:1903320 | regulation of protein modification by small protein conjugation or removal | 15 367 | 3.91E-05 | 0.002407 | 15 | Biological process |
| GO:1902652 | secondary alcohol metabolic process                                        | 12 367 | 3.91E-05 | 0.002407 | 12 | Biological process |

|            |                                                                                     |        |          |          |    |                    |
|------------|-------------------------------------------------------------------------------------|--------|----------|----------|----|--------------------|
| GO:0006979 | response to oxidative stress                                                        | 23 367 | 4.53E-05 | 0.00274  | 23 | Biological process |
| GO:0046890 | regulation of lipid biosynthetic process                                            | 13 367 | 4.80E-05 | 0.002856 | 13 | Biological process |
| GO:0016125 | sterol metabolic process                                                            | 12 367 | 8.68E-05 | 0.005086 | 12 | Biological process |
| GO:0008202 | steroid metabolic process                                                           | 18 367 | 9.60E-05 | 0.005539 | 18 | Biological process |
| GO:0061013 | regulation of mRNA catabolic process                                                | 13 367 | 0.000109 | 0.006216 | 13 | Biological process |
| GO:2001242 | regulation of intrinsic apoptotic signaling pathway                                 | 12 367 | 0.000125 | 0.007014 | 12 | Biological process |
| GO:0097193 | intrinsic apoptotic signaling pathway                                               | 17 367 | 0.000128 | 0.007014 | 17 | Biological process |
| GO:0031396 | regulation of protein ubiquitination                                                | 13 367 | 0.000129 | 0.007014 | 13 | Biological process |
| GO:0006694 | steroid biosynthetic process                                                        | 13 367 | 0.000144 | 0.007703 | 13 | Biological process |
| GO:0006402 | mRNA catabolic process                                                              | 19 367 | 0.000149 | 0.007845 | 19 | Biological process |
| GO:0086004 | regulation of cardiac muscle cell contraction                                       | 6 367  | 0.000164 | 0.008508 | 6  | Biological process |
| GO:0006401 | RNA catabolic process                                                               | 20 367 | 0.000168 | 0.008508 | 20 | Biological process |
| GO:0032020 | ISG15-protein conjugation                                                           | 3 367  | 0.00017  | 0.008508 | 3  | Biological process |
| GO:0086073 | bundle of His cell-Purkinje myocyte adhesion involved in cell communication         | 3 367  | 0.00017  | 0.008508 | 3  | Biological process |
| GO:0032434 | regulation of proteasomal ubiquitin-dependent protein catabolic process             | 10 367 | 0.00019  | 0.009275 | 10 | Biological process |
| GO:0046718 | viral entry into host cell                                                          | 10 367 | 0.00019  | 0.009275 | 10 | Biological process |
| GO:1903321 | negative regulation of protein modification by small protein conjugation or removal | 8 367  | 0.000195 | 0.009375 | 8  | Biological process |
| GO:2000058 | regulation of ubiquitin-dependent protein catabolic process                         | 11 367 | 0.000202 | 0.009576 | 11 | Biological process |
| GO:0019985 | translesion synthesis                                                               | 6 367  | 0.000216 | 0.010127 | 6  | Biological process |
| GO:0032479 | regulation of type I interferon production                                          | 10 367 | 0.00025  | 0.011555 | 10 | Biological process |
| GO:0032606 | type I interferon production                                                        | 10 367 | 0.000267 | 0.01219  | 10 | Biological process |



|            |                                                                        |        |          |          |    |                    |
|------------|------------------------------------------------------------------------|--------|----------|----------|----|--------------------|
| GO:0086042 | cardiac muscle cell-cardiac muscle cell<br>adhesion                    | 3 367  | 0.000293 | 0.013217 | 3  | Biological process |
| GO:0033559 | unsaturated fatty acid metabolic process                               | 9 367  | 0.000296 | 0.013217 | 9  | Biological process |
| GO:0043161 | proteasome-mediated ubiquitin-dependent<br>protein catabolic process   | 20 367 | 0.000315 | 0.013722 | 20 | Biological process |
| GO:0045646 | regulation of erythrocyte differentiation                              | 6 367  | 0.000318 | 0.013722 | 6  | Biological process |
| GO:1903115 | regulation of actin filament-based movement                            | 6 367  | 0.000318 | 0.013722 | 6  | Biological process |
| GO:0031397 | negative regulation of protein ubiquitination                          | 7 367  | 0.000392 | 0.016689 | 7  | Biological process |
| GO:1902186 | regulation of viral release from host cell                             | 5 367  | 0.000411 | 0.017327 | 5  | Biological process |
| GO:0022613 | ribonucleoprotein complex biogenesis                                   | 22 367 | 0.000416 | 0.017327 | 22 | Biological process |
| GO:1904580 | regulation of intracellular mRNA localization                          | 2 367  | 0.000431 | 0.017573 | 2  | Biological process |
| GO:1904582 | positive regulation of intracellular mRNA<br>localization              | 2 367  | 0.000431 | 0.017573 | 2  | Biological process |
| GO:0046456 | icosanoid biosynthetic process                                         | 6 367  | 0.000455 | 0.018354 | 6  | Biological process |
| GO:0002483 | antigen processing and presentation of<br>endogenous peptide antigen   | 3 367  | 0.000462 | 0.018426 | 3  | Biological process |
| GO:0043276 | anoikis                                                                | 5 367  | 0.000479 | 0.018925 | 5  | Biological process |
| GO:0032480 | negative regulation of type I interferon<br>production                 | 6 367  | 0.00051  | 0.019679 | 6  | Biological process |
| GO:0030260 | entry into host cell                                                   | 10 367 | 0.000526 | 0.019679 | 10 | Biological process |
| GO:0044409 | entry into host                                                        | 10 367 | 0.000526 | 0.019679 | 10 | Biological process |
| GO:0051806 | entry into cell of other organism involved in<br>symbiotic interaction | 10 367 | 0.000526 | 0.019679 | 10 | Biological process |
| GO:0051828 | entry into other organism involved in<br>symbiotic<br>interaction      | 10 367 | 0.000526 | 0.019679 | 10 | Biological process |

|            |                                                                             |        |          |          |    |                    |
|------------|-----------------------------------------------------------------------------|--------|----------|----------|----|--------------------|
| GO:0043488 | regulation of mRNA stability                                                | 11 367 | 0.00053  | 0.019679 | 11 | Biological process |
| GO:2001234 | negative regulation of apoptotic signaling pathway                          | 13 367 | 0.000536 | 0.019721 | 13 | Biological process |
| GO:0098901 | regulation of cardiac muscle cell action potential                          | 5 367  | 0.000555 | 0.019759 | 5  | Biological process |
| GO:1901673 | regulation of mitotic spindle assembly                                      | 4 367  | 0.000556 | 0.019759 | 4  | Biological process |
| GO:0006633 | fatty acid biosynthetic process                                             | 10 367 | 0.000558 | 0.019759 | 10 | Biological process |
| GO:0007565 | female pregnancy                                                            | 12 367 | 0.000558 | 0.019759 | 12 | Biological process |
| GO:0051170 | import into nucleus                                                         | 11 367 | 0.000652 | 0.022847 | 11 | Biological process |
| GO:0044706 | multi-multicellular organism process                                        | 13 367 | 0.000667 | 0.023157 | 13 | Biological process |
| GO:0034341 | response to interferon-gamma                                                | 12 367 | 0.000674 | 0.023187 | 12 | Biological process |
| GO:0060700 | regulation of ribonuclease activity                                         | 3 367  | 0.000682 | 0.023255 | 3  | Biological process |
| GO:0019216 | regulation of lipid metabolic process                                       | 18 367 | 0.000691 | 0.023351 | 18 | Biological process |
| GO:0019076 | viral release from host cell                                                | 5 367  | 0.000734 | 0.023742 | 5  | Biological process |
| GO:0035890 | exit from host                                                              | 5 367  | 0.000734 | 0.023742 | 5  | Biological process |
| GO:0035891 | exit from host cell                                                         | 5 367  | 0.000734 | 0.023742 | 5  | Biological process |
| GO:0052126 | movement in host environment                                                | 5 367  | 0.000734 | 0.023742 | 5  | Biological process |
| GO:0052192 | movement in environment of other organism involved in symbiotic interaction | 5 367  | 0.000734 | 0.023742 | 5  | Biological process |
| GO:0006301 | postreplication repair                                                      | 6 367  | 0.00078  | 0.024805 | 6  | Biological process |
| GO:0098900 | regulation of action potential                                              | 6 367  | 0.00078  | 0.024805 | 6  | Biological process |
| GO:0043487 | regulation of RNA stability                                                 | 11 367 | 0.000796 | 0.025092 | 11 | Biological process |
| GO:0006631 | fatty acid metabolic process                                                | 18 367 | 0.000833 | 0.025774 | 18 | Biological process |
| GO:0006692 | prostanoid metabolic process                                                | 5 367  | 0.000838 | 0.025774 | 5  | Biological process |
| GO:0006693 | prostaglandin metabolic process                                             | 5 367  | 0.000838 | 0.025774 | 5  | Biological process |
| GO:0001701 | in utero embryonic development                                              | 16 367 | 0.000872 | 0.026591 | 16 | Biological process |

|            |                                                                         |        |          |          |    |                    |
|------------|-------------------------------------------------------------------------|--------|----------|----------|----|--------------------|
| GO:0071346 | cellular response to interferon-gamma                                   | 11 367 | 0.000921 | 0.027722 | 11 | Biological process |
| GO:0017038 | protein import                                                          | 12 367 | 0.000924 | 0.027722 | 12 | Biological process |
| GO:0002934 | desmosome organization                                                  | 3 367  | 0.000959 | 0.028111 | 3  | Biological process |
| GO:1904896 | ESCRT complex disassembly                                               | 3 367  | 0.000959 | 0.028111 | 3  | Biological process |
| GO:1904903 | ESCRT III complex disassembly                                           | 3 367  | 0.000959 | 0.028111 | 3  | Biological process |
| GO:0007249 | I-kappaB kinase/NF-kappaB signaling                                     | 14 367 | 0.000981 | 0.028509 | 14 | Biological process |
| GO:0032469 | endoplasmic reticulum calcium ion homeostasis                           | 4 367  | 0.000999 | 0.028828 | 4  | Biological process |
| GO:0014074 | response to purine-containing compound                                  | 10 367 | 0.001019 | 0.029183 | 10 | Biological process |
| GO:0045862 | positive regulation of proteolysis                                      | 17 367 | 0.001106 | 0.031426 | 17 | Biological process |
| GO:0071260 | cellular response to mechanical stimulus                                | 7 367  | 0.001181 | 0.033292 | 7  | Biological process |
| GO:2000209 | regulation of anoikis                                                   | 4 367  | 0.00119  | 0.033305 | 4  | Biological process |
| GO:0002428 | antigen processing and presentation of peptide antigen via MHC class Ib | 2 367  | 0.001275 | 0.034112 | 2  | Biological process |
| GO:0035928 | rRNA import into mitochondrion                                          | 2 367  | 0.001275 | 0.034112 | 2  | Biological process |
| GO:0042270 | protection from natural killer cell mediated cytotoxicity               | 2 367  | 0.001275 | 0.034112 | 2  | Biological process |
| GO:1903719 | regulation of I-kappaB phosphorylation                                  | 2 367  | 0.001275 | 0.034112 | 2  | Biological process |
| GO:1903721 | positive regulation of I-kappaB phosphorylation                         | 2 367  | 0.001275 | 0.034112 | 2  | Biological process |
| GO:0072659 | protein localization to plasma membrane                                 | 13 367 | 0.001277 | 0.034112 | 13 | Biological process |
| GO:0006066 | alcohol metabolic process                                               | 16 367 | 0.001294 | 0.034112 | 16 | Biological process |
| GO:0019883 | antigen processing and presentation of endogenous antigen               | 3 367  | 0.001299 | 0.034112 | 3  | Biological process |
| GO:0043312 | neutrophil degranulation                                                | 21 367 | 0.00131  | 0.034112 | 21 | Biological process |
| GO:0062012 | regulation of small molecule metabolic                                  | 21 367 | 0.00131  | 0.034112 | 21 | Biological process |

|            |                                                                                  |        |          |          |    |                    |
|------------|----------------------------------------------------------------------------------|--------|----------|----------|----|--------------------|
|            | process                                                                          |        |          |          |    |                    |
| GO:0010498 | proteasomal protein catabolic process                                            | 20 367 | 0.001346 | 0.034814 | 20 | Biological process |
| GO:0060135 | maternal process involved in female pregnancy                                    | 6 367  | 0.00138  | 0.035451 | 6  | Biological process |
| GO:0002283 | neutrophil activation involved in immune response                                | 21 367 | 0.001413 | 0.036045 | 21 | Biological process |
| GO:0007568 | aging                                                                            | 15 367 | 0.001505 | 0.038151 | 15 | Biological process |
| GO:0032436 | positive regulation of proteasomal ubiquitin-dependent protein catabolic process | 7 367  | 0.001583 | 0.039848 | 7  | Biological process |
| GO:1901617 | organic hydroxy compound biosynthetic process                                    | 13 367 | 0.001603 | 0.040075 | 13 | Biological process |
| GO:0090169 | regulation of spindle assembly                                                   | 4 367  | 0.001645 | 0.040862 | 4  | Biological process |
| GO:0006397 | mRNA processing                                                                  | 21 367 | 0.001681 | 0.041467 | 21 | Biological process |
| GO:0098798 | mitochondrial protein complex                                                    | 47 372 | 3.55E-31 | 1.72E-28 | 47 | Cellular component |
| GO:0005747 | mitochondrial respiratory chain complex I                                        | 21 372 | 7.10E-23 | 8.58E-21 | 21 | Cellular component |
| GO:0030964 | NADH dehydrogenase complex                                                       | 21 372 | 7.10E-23 | 8.58E-21 | 21 | Cellular component |
| GO:0045271 | respiratory chain complex I                                                      | 21 372 | 7.10E-23 | 8.58E-21 | 21 | Cellular component |
| GO:0098800 | inner mitochondrial membrane protein complex                                     | 27 372 | 3.97E-19 | 3.84E-17 | 27 | Cellular component |
| GO:0098803 | respiratory chain complex                                                        | 22 372 | 8.12E-19 | 6.54E-17 | 22 | Cellular component |
| GO:0005746 | mitochondrial respiratory chain                                                  | 22 372 | 6.72E-18 | 4.64E-16 | 22 | Cellular component |
| GO:1990204 | oxidoreductase complex                                                           | 23 372 | 3.48E-17 | 1.93E-15 | 23 | Cellular component |
| GO:0070469 | respiratory chain                                                                | 22 372 | 3.59E-17 | 1.93E-15 | 22 | Cellular component |
| GO:0005759 | mitochondrial matrix                                                             | 42 372 | 8.74E-17 | 4.22E-15 | 42 | Cellular component |
| GO:0000313 | organellar ribosome                                                              | 19 372 | 3.86E-15 | 1.55E-13 | 19 | Cellular component |
| GO:0005761 | mitochondrial ribosome                                                           | 19 372 | 3.86E-15 | 1.55E-13 | 19 | Cellular component |

|            |                                                                                     |        |          |          |    |                    |
|------------|-------------------------------------------------------------------------------------|--------|----------|----------|----|--------------------|
| GO:0005840 | ribosome                                                                            | 29 372 | 8.88E-15 | 3.30E-13 | 29 | Cellular component |
| GO:0044455 | mitochondrial membrane part                                                         | 27 372 | 4.26E-14 | 1.47E-12 | 27 | Cellular component |
| GO:0044391 | ribosomal subunit                                                                   | 23 372 | 6.34E-12 | 2.04E-10 | 23 | Cellular component |
| GO:0015934 | large ribosomal subunit                                                             | 16 372 | 2.34E-09 | 7.07E-08 | 16 | Cellular component |
| GO:0000315 | organellar large ribosomal subunit                                                  | 11 372 | 4.85E-09 | 1.30E-07 | 11 | Cellular component |
| GO:0005762 | mitochondrial large ribosomal subunit                                               | 11 372 | 4.85E-09 | 1.30E-07 | 11 | Cellular component |
| GO:0005925 | focal adhesion                                                                      | 24 372 | 1.28E-06 | 3.25E-05 | 24 | Cellular component |
| GO:0005924 | cell-substrate adherens junction                                                    | 24 372 | 1.46E-06 | 3.53E-05 | 24 | Cellular component |
| GO:0030055 | cell-substrate junction                                                             | 24 372 | 1.82E-06 | 4.19E-05 | 24 | Cellular component |
| GO:0000314 | organellar small ribosomal subunit                                                  | 6 372  | 1.55E-05 | 0.000325 | 6  | Cellular component |
| GO:0005763 | mitochondrial small ribosomal subunit                                               | 6 372  | 1.55E-05 | 0.000325 | 6  | Cellular component |
| GO:0005635 | nuclear envelope                                                                    | 22 372 | 0.000125 | 0.002521 | 22 | Cellular component |
| GO:0016607 | nuclear speck                                                                       | 19 372 | 0.000244 | 0.004712 | 19 | Cellular component |
| GO:0009368 | endopeptidase Clp complex                                                           | 2 372  | 0.000395 | 0.007336 | 2  | Cellular component |
| GO:0015935 | small ribosomal subunit                                                             | 7 372  | 0.000615 | 0.011011 | 7  | Cellular component |
| GO:0034666 | integrin alpha2-beta1 complex                                                       | 2 372  | 0.001169 | 0.020167 | 2  | Cellular component |
| GO:0000803 | sex chromosome                                                                      | 4 372  | 0.00163  | 0.027152 | 4  | Cellular component |
| GO:0005791 | rough endoplasmic reticulum                                                         | 7 372  | 0.002117 | 0.034096 | 7  | Cellular component |
| GO:0043625 | delta DNA polymerase complex                                                        | 2 372  | 0.002307 | 0.03595  | 2  | Cellular component |
| GO:0008137 | NADH dehydrogenase (ubiquinone) activity                                            | 21 363 | 1.04E-23 | 2.37E-21 | 21 | Molecular function |
| GO:0050136 | NADH dehydrogenase (quinone) activity                                               | 21 363 | 1.04E-23 | 2.37E-21 | 21 | Molecular function |
| GO:0016655 | oxidoreductase activity, acting on NAD(P)H, quinone or similar compound as acceptor | 23 363 | 1.06E-23 | 2.37E-21 | 23 | Molecular function |
| GO:0003954 | NADH dehydrogenase activity                                                         | 21 363 | 3.21E-23 | 5.39E-21 | 21 | Molecular function |
| GO:0016651 | oxidoreductase activity, acting on NAD(P)H                                          | 23 363 | 9.72E-17 | 1.31E-14 | 23 | Molecular function |
| GO:0003735 | structural constituent of ribosome                                                  | 22 363 | 2.72E-12 | 3.05E-10 | 22 | Molecular function |

|            |                                                                                                   |        |          |          |    |                    |
|------------|---------------------------------------------------------------------------------------------------|--------|----------|----------|----|--------------------|
| GO:0044389 | ubiquitin-like protein ligase binding                                                             | 20 363 | 1.40E-05 | 0.001348 | 20 | Molecular function |
| GO:0009055 | electron transfer activity                                                                        | 11 363 | 2.45E-05 | 0.002056 | 11 | Molecular function |
| GO:0031625 | ubiquitin protein ligase binding                                                                  | 18 363 | 8.29E-05 | 0.004964 | 18 | Molecular function |
| GO:0016717 | oxidoreductase activity, acting on paired donors, with oxidation of a pair of donors resulting in | 3 363  | 8.51E-05 | 0.004964 | 3  | Molecular function |
| GO:0086083 | cell adhesive protein binding involved in bundle of His cell-Purkinje myocyte communication       | 3 363  | 8.51E-05 | 0.004964 | 3  | Molecular function |
| GO:0050839 | cell adhesion molecule binding                                                                    | 24 363 | 8.87E-05 | 0.004964 | 24 | Molecular function |
| GO:0045296 | cadherin binding                                                                                  | 18 363 | 0.000151 | 0.007641 | 18 | Molecular function |
| GO:0098631 | cell adhesion mediator activity                                                                   | 6 363  | 0.000159 | 0.007641 | 6  | Molecular function |
| GO:0051539 | 4 iron, 4 sulfur cluster binding                                                                  | 6 363  | 0.000183 | 0.00821  | 6  | Molecular function |
| GO:0048037 | cofactor binding                                                                                  | 23 363 | 0.000237 | 0.009968 | 23 | Molecular function |
| GO:0008266 | poly(U) RNA binding                                                                               | 4 363  | 0.000546 | 0.021561 | 4  | Molecular function |
| GO:0001618 | virus receptor activity                                                                           | 7 363  | 0.000838 | 0.029623 | 7  | Molecular function |
| GO:0104005 | hijacked molecular function                                                                       | 7 363  | 0.000838 | 0.029623 | 7  | Molecular function |
| GO:0086080 | protein binding involved in heterotypic cell-cell adhesion                                        | 3 363  | 0.000946 | 0.031483 | 3  | Molecular function |
| GO:0031072 | heat shock protein binding                                                                        | 9 363  | 0.000984 | 0.031483 | 9  | Molecular function |
| GO:0008187 | poly-pyrimidine tract binding                                                                     | 4 363  | 0.001168 | 0.035334 | 4  | Molecular function |
| GO:0004768 | stearoyl-CoA 9-desaturase activity                                                                | 2 363  | 0.001263 | 0.035334 | 2  | Molecular function |
| GO:0016215 | acyl-CoA desaturase activity                                                                      | 2 363  | 0.001263 | 0.035334 | 2  | Molecular function |
| GO:0019843 | rRNA binding                                                                                      | 6 363  | 0.001345 | 0.036134 | 6  | Molecular function |
| GO:0017091 | AU-rich element binding                                                                           | 4 363  | 0.001615 | 0.04172  | 4  | Molecular function |

**Table S5 Enriched GO pathway of differentially expressed proteins in compound 8 treatment at 100 µg/mL in influenza A-infected A549 cell model**

| <b>Pathway name</b>                         | <b>GeneRatio</b> | <b>BgRatio</b> | <b>pvalue</b> | <b>qvalue</b> | <b>Count</b> |
|---------------------------------------------|------------------|----------------|---------------|---------------|--------------|
| Oxidative phosphorylation                   | 26 237           | 133 8034       | 7.82E-15      | 1.84E-12      | 26           |
| Non-alcoholic fatty liver disease (NAFLD)   | 26 237           | 149 8034       | 1.34E-13      | 1.57E-11      | 26           |
| Parkinson disease                           | 30 237           | 249 8034       | 3.33E-11      | 2.62E-09      | 30           |
| Retrograde endocannabinoid signaling        | 22 237           | 148 8034       | 2.92E-10      | 1.72E-08      | 22           |
| Thermogenesis                               | 27 237           | 231 8034       | 6.93E-10      | 3.27E-08      | 27           |
| Huntington disease                          | 31 237           | 306 8034       | 1.27E-09      | 4.98E-08      | 31           |
| Alzheimer disease                           | 34 237           | 369 8034       | 2.29E-09      | 7.71E-08      | 34           |
| Ribosome                                    | 15 237           | 158 8034       | 6.16E-05      | 0.001815151   | 15           |
| Influenza A                                 | 15 237           | 170 8034       | 0.000141691   | 0.003712128   | 15           |
| Steroid biosynthesis                        | 5 237            | 20 8034        | 0.000230959   | 0.005445774   | 5            |
| Epstein-Barr virus infection                | 16 237           | 201 8034       | 0.000282087   | 0.006046654   | 16           |
| Measles                                     | 12 237           | 138 8034       | 0.000748085   | 0.01469921    | 12           |
| Protein processing in endoplasmic reticulum | 13 237           | 167 8034       | 0.001284616   | 0.023299915   | 13           |

**Table S6 Enriched KEGG pathway of differentially expressed proteins in compound 8 treatment at 100 µg/mL in influenza A-infected A549 cell model**
